# 1 The population tracking model: A simple, 2 scalable statistical model for neural population 3 data

4 *Cian O'Donnell<sup>1,3,\*</sup>, J. Tiago Gonçalves<sup>4,5</sup>, Nick Whiteley<sup>2</sup>,*  
*Carlos Portera-Cailliau<sup>5</sup> and Terrence J. Sejnowski<sup>3,6,\*</sup>*

5 <sup>1</sup>Department of Computer Science, <sup>2</sup>School of Mathematics, University of Bristol, Bristol,  
6 UK

7 <sup>3</sup>Howard Hughes Medical Institute, <sup>4</sup>Salk Institute for Biological Studies, La Jolla CA, USA

8 <sup>5</sup>Departments of Neurology and Neurobiology, David Geffen School of Medicine at UCLA,  
9 Los Angeles, CA, USA

10 <sup>6</sup>Division of Biological Sciences, University of California at San Diego, La Jolla, CA, USA

11 \*Correspondence: [cian.odonnell@bristol.ac.uk](mailto:cian.odonnell@bristol.ac.uk) (C.O'D.), [terry@salk.edu](mailto:terry@salk.edu) (T.J.S.)

## 12 **Abstract**

13 Our understanding of neural population coding has been limited by a lack of analysis methods  
14 to characterize spiking data from large populations. The biggest challenge comes from the fact  
15 that the number of possible network activity patterns scales exponentially with the number of  
16 neurons recorded ( $\sim 2^{\text{Neurons}}$ ). Here we introduce a new statistical method for characterizing neural  
17 population activity that requires semi-independent fitting of only as many parameters as the square  
18 of the number of neurons, so requiring drastically smaller data sets and minimal computation time.

19 The model works by matching the population rate (the number of neurons synchronously active)  
20 and the probability that each individual neuron fires given the population rate. We found that  
21 this model can accurately fit synthetic data from up to 1000 neurons. We also found that the  
22 model could rapidly decode visual stimuli from neural population data from macaque primary  
23 visual cortex,  $\sim 65$  ms after stimulus onset. Finally, we used the model to estimate the entropy of  
24 neural population activity in developing mouse somatosensory cortex and surprisingly found that  
25 it first increases, then decreases during development. This statistical model opens new options for  
26 interrogating neural population data, and can bolster the use of modern large-scale in vivo  $\text{Ca}^{2+}$   
27 and voltage imaging tools.

## 28 **1 Introduction**

29 Brains encode and process information as electrical activity over populations of their neu-  
30 rons (Churchland and Sejnowski, 1994; Averbek et al., 2006). Although understanding the  
31 structure of this neural code has long been a central goal of neuroscience, historical progress  
32 has been impeded by limitations in recording techniques. Traditional extracellular recording  
33 electrodes allowed isolation of only one or a few neurons at a time (Stevenson and Kording,  
34 2011). Given that the human brain has on the order of  $10^{11}$  neurons, the contribution of  
35 such small groups of neurons to brain processing is likely minimal. To get a more complete  
36 picture we would instead like to simultaneously observe the activity of large populations of  
37 neurons. Although the ideal scenario — recording every neuron in the brain — is out of  
38 reach for now, recent developments in both electrical and optical recording technologies have  
39 increased the typical size of population recording so that many laboratories now routinely  
40 record from hundreds or even thousands of neurons (Stevenson and Kording, 2011). The  
41 advent of these big neural data has introduced a new problem: how to analyze them.

42 The most commonly applied analysis to neural population data is to simply examine  
43 the activity properties of each neuron in turn, as if they were recorded in separate animals.  
44 However responses of nearby neurons to sensory stimuli are often significantly correlated,

45 implying that neurons do not process information independently (Perkel et al., 1967; Gerstein  
46 and Perkel, 1969, 1972; Singer, 1999; Cohen and Kohn, 2011). As a result, performing a cell-  
47 by-cell analysis amounts to throwing away potentially valuable information on the collective  
48 behavior of the recorded neurons. These correlations are important because they put strong  
49 functional constraints on neural coding (Zohary et al., 1994; Averbach et al., 2006).

50 If we consider each neuron to have two spiking activity states, ON or OFF, then a  
51 population of  $N$  neurons as a whole can have  $2^N$  possible ON/OFF patterns at any moment  
52 in time. The probability of seeing any particular one of these population activity patterns  
53 depends on the brain circuit examined, the stimuli the animal is subject to, and perhaps  
54 also the internal brain state of the animal. Neural correlations and sparse firing imply that  
55 the probability of some activity patterns are more likely than others. To help understand  
56 the neural code we would like to be able to estimate the probability distribution across  
57 all  $2^N$  patterns,  $P_{true}$ . For small  $N$ , the probability of each pattern can be estimated by  
58 simply counting each time it appears, then dividing by the total number of timepoints  
59 recorded. However, since the number of possible patterns increases exponentially with  $N$ , this  
60 histogram method is experimentally intractable for populations larger than  $\sim 10$  neurons.  
61 For example, 20 neurons would require fitting  $2^{20} \approx 10^6$  parameters, one for each possible  
62 activity pattern. To accurately fit this model by counting patterns alone would require data  
63 recorded for many weeks or months. The problem gets worse for larger numbers of neurons:  
64 each additional neuron recorded requires a doubling in the recording time to reach the same  
65 level of statistical accuracy. This explosive scaling implies that we can never know the true  
66 distribution of pattern probabilities for a large number of neurons in a real brain.

67 This problem remained intractable until a seminal paper in 2006 demonstrated a possible  
68 solution: to fit a statistical model to the data that matches only some of the key low-order  
69 statistics, such as firing rates and pairwise correlations, and assume nothing else (Schneidman  
70 et al., 2006). The hope was that these basic statistics are sufficient for the model to capture  
71 the majority of structure present in the real data so that  $P_{model} \approx P_{true}$ . Indeed early

72 studies showed that such *pairwise maximum entropy* models could accurately capture activity  
73 pattern probabilities from recordings of 10–15 neurons in retina and cortex (Schneidman  
74 et al., 2006; Shlens et al., 2006; Tang et al., 2008; Yu et al., 2008). Unfortunately however,  
75 later studies found that performance of these pairwise models was poor for larger populations  
76 and in different activity regimes (Ohiorhenuan et al., 2010; Ganmor et al., 2011; Yu et al.,  
77 2011; Yeh et al., 2010), as predicted by theoretical work (Roudi et al., 2009; Macke et al.,  
78 2011a). As a consequence, variants of the pairwise maximum entropy models have been  
79 proposed that include higher-order correlation terms (Ganmor et al., 2011; Tkacik et al.,  
80 2013, 2014), but these are difficult to fit for large  $N$  and are not readily normalizable.  
81 Alternative approaches have also been developed that appear to provide better matches to  
82 data (Amari et al., 2003; Pillow et al., 2008; Macke et al., 2009, 2011b; Köster et al., 2014;  
83 Okun et al., 2012; Park et al., 2013; Okun et al., 2015; Schölvinck et al., 2015; Cui et al.,  
84 2016), but these suffer from similar shortcomings (Table 1). We suggest the following criteria  
85 for an ideal statistical model for neural population data:

- 86 1. It should accurately capture the structure in real neural population data.
- 87 2. Its fitting procedure should scale well to large  $N$ , meaning that the model’s parameters  
88 can be fit to data from large neural populations with a reasonable amount of data and  
89 computational resources.
- 90 3. Quantitative predictions can be made from the model after it is fit.

91 No existing model meets all three of these demands (Table 1). Here we propose a novel,  
92 simple statistical method that does: the population tracking model. The model is specified  
93 by only  $N^2$  parameters:  $N$  to specify the distribution of number of neurons synchronously  
94 active, and a further  $N^2 - N$  for the conditional probabilities that each individual neuron  
95 is ON given the population rate. Although no model with  $N^2$  parameters can ever fully  
96 capture all  $2^N$  pattern probabilities, we find that the population tracking model strikes  
97 a good balance between accuracy, tractability, and usefulness: by design it matches key

98 features of the data, its parameters can be easily fit for large  $N$ , it is normalizable allowing  
99 expression of pattern probabilities in closed form, and most surprisingly it allows estimation  
100 of measures of the entire probability distribution, as we demonstrate for neural populations  
101 as large as  $N = 1000$ .

102 The results sections of this paper is structured as follows. In section 2.1 we introduce  
103 the basic mathematical form of the model, and fit it to spiking data from macaque visual  
104 cortex as an illustration. In sections 2.2 and 2.3 we cover how the model parameters can be  
105 estimated from data, and how to sample synthetic data from the fitted model. In section 2.4  
106 we show how a reduced  $3N$ -parameter model of the entire  $2^N$ -dimensional pattern probability  
107 distribution can be derived from the model parameters, and how this reduced model can  
108 be used to estimate the population entropy, and the divergence between the model fits to  
109 two different datasets. In sections 2.5, 2.6 and 2.7 we show how the model's estimates for  
110 entropy and pattern probabilities converge as a function of neuron number and time samples  
111 available. Finally, in sections 2.7 and 2.8 we show how the method can help give novel  
112 biological insights by applying it to two data sets: first we use the model to decode stimuli  
113 from the recorded electrophysiological spiking responses in macaque V1, and second, we  
114 analyze *in vivo* two-photon  $\text{Ca}^{2+}$  imaging data from mouse somatosensory cortex to explore  
115 how the entropy of neural population activity changes during development.

## 116 **2 Results**

### 117 **2.1 Overview of the statistical model with example application to** 118 **data.**

119 We consider parallel recordings of the electrical activity of a population of  $N$  neurons. If  
120 the recordings are made using electrophysiology, then spike sorting methods can be used to  
121 extract the times of action potentials emitted by each neuron from the raw voltage wave-  
122 forms (Quiroga, 2012). If the data are recorded using imaging methods, for example via

| Model                             | References                                     | Number of parameters | Sampling possible? | Fit for large $N$ ? | Direct estimates of pattern probabilities? | Low-dimensional model of entire distribution? |
|-----------------------------------|------------------------------------------------|----------------------|--------------------|---------------------|--------------------------------------------|-----------------------------------------------|
| Pairwise maximum entropy          | Schneidman et al. (2006); Shlens et al. (2006) | $\sim N^2$           | Yes                | Difficult           | Difficult                                  | No                                            |
| K-pairwise maximum entropy        | Tkacik et al. (2013, 2014)                     | $\sim N^2$           | Yes                | Difficult           | Difficult                                  | No                                            |
| Spatiotemporal maximum entropy    | Marre et al. (2009); Nasser et al. (2013)      | $\sim RN^2$          | Yes                | Difficult           | Difficult                                  | No                                            |
| semi-Restricted Boltzmann Machine | Köster et al. (2014)                           | $\sim N^2$           | Yes                | Difficult           | Difficult                                  | No                                            |
| Reliable interaction model        | Ganmor et al. (2011)                           | Data-dependent       | No                 | Yes                 | Approximate                                | No                                            |
| Generalized Linear Models         | Pillow et al. (2008)                           | $\sim DN^2$          | Yes                | Difficult           | No                                         | No                                            |
| Dichotomized Gaussian             | Amari et al. (2003); Macke et al. (2009)       | $\sim N^2$           | Yes                | Yes                 | No                                         | No                                            |
| Cascaded Logistic                 | Park et al. (2013)                             | $\sim N^2$           | Yes                | Yes                 | Yes                                        | No                                            |
| Population coupling               | Okun et al. (2012, 2015)                       | $3N$                 | Yes                | Yes                 | No                                         | No                                            |
| Population tracking               | This study                                     | $N^2$                | Yes                | Yes                 | Yes                                        | Yes                                           |

Tab. 1: Comparison of properties of various statistical models of neural activity.

For the “Number of parameters” column,  $N$  indicates the number neurons considered,  $\sim$  indicates “scales with”,  $D$  indicates the number of coefficients per interaction term, and  $R$  indicates the number of timepoints across which temporal correlations are considered.

123 a  $\text{Ca}^{2+}$ -sensitive fluorophore, then electrical spike times or neural firing rates can often be  
124 approximately inferred (Pnevmatikakis et al., 2016; Rahmati et al., 2016). Regardless of the  
125 way the in which the data are collected, at any particular timepoint in the recording some  
126 subset of these neurons may be active (ON), and the rest inactive (OFF). In the case of  
127 electrophysiologically recorded spike trains, the neurons considered ON might be those that  
128 emitted one or more spikes within a particular time bin  $\Delta t$ . For fluorescence imaging data,  
129 a suitable threshold in the  $\Delta F(t)/F_0$  signal may be chosen to split neurons into ON and  
130 OFF groups, perhaps after also binning the data in time. Once we have binarized the neural  
131 activity data in this way, each neuron's activity across time is reduced to a binary sequence  
132 of zeros and ones, where a zero represents silence and a one represents activity. For example,  
133 the  $i$ th neuron's activity in the population might be  $\mathbf{x}_i = 0, 1, 0, 0, 0, 1, 1, 0, 1 \dots$ . The length  
134 of the sequence  $T$  is simply the total number of time bins recorded. The brain might encode  
135 sensory information about the world in these patterns of neural population activity.

136 Next we can next group the neural population data into a large  $N \times T$  matrix  $\mathbf{M}$  where  
137 each row from  $i = 1 : N$  corresponds to a different neuron and each column from  $j = 1 : T$   
138 corresponds to a different time point. At any particular time point (the  $j$ th column of  $\mathbf{M}$ ),  
139 we could in principle see any possible pattern of inactive and active neurons, written as  
140 a vector of zeros and ones  $\{x\}_j = [x_{1j}, x_{2j} \dots x_{Nj}]^T$ . In general, there will be  $2^N$  possible  
141 patterns of population activity, or combinations of zeros and ones. In any given experiment,  
142 each particular pattern must have some ground-truth probability of appearing  $P_{true}(\{x\})$ ,  
143 depending on the stimulus, animal's brain state, and so on. We would like to estimate this  
144  $2^N$ -dimensional probability distribution. However, since direct estimation is impossible, we  
145 instead fit the parameters of a simpler statistical model that implicitly specifies a different  
146 probability distribution over the patterns,  $P_{model}(\{x\})$ . The hope is that for typical neural  
147 data,  $P_{model}(\{x\}) \approx P_{true}(\{x\})$ . In figure 1 we schematize the procedure for building and  
148 using such a model.

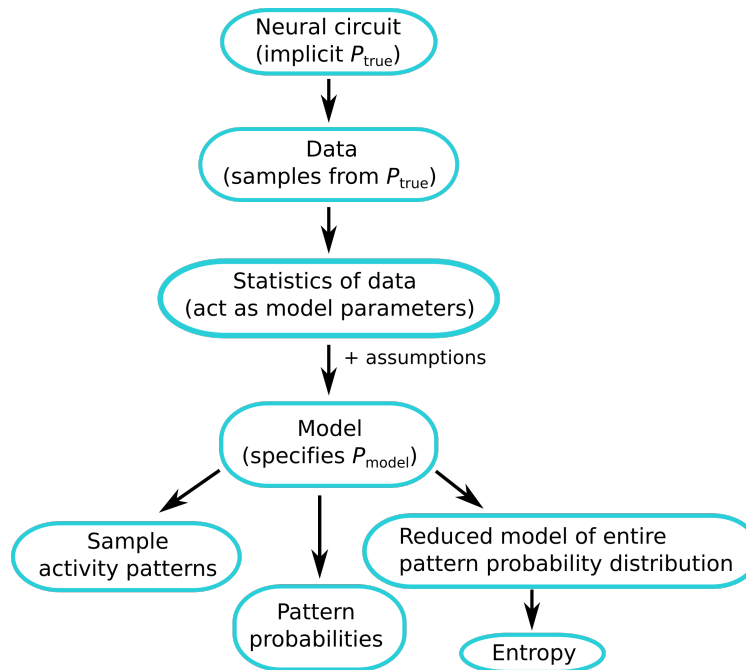

Fig. 1: Schematic diagram of the model-building and utilization procedure. The neural circuit generates activity patterns sampled from some implicit distribution  $P_{true}$ , which are recorded by an experimentalist as data. We estimate certain statistics of these data to be used as parameters for the model. The model is a mathematical equation that specifies a probability distribution over all possible patterns  $P_{model}$ , whether or not each pattern was ever observed in the recorded data. We can then use the model for several applications: to sample synthetic activity patterns, to directly estimate pattern probabilities, or to build an even simpler model of the entire pattern probability distribution to estimate quantities such as the entropy.

149 The statistical model we propose for neural population data contains two sets of param-  
150 eters that are fit in turn. The first set are the  $N$  free parameters needed to describe the  
151 population synchrony distribution: the probability distribution  $\Pr(K = k) = p(k)$  for the  
152 number of neurons simultaneously active  $K$ , where  $K = \sum_{i=1}^N x_i$ . This distribution acts as  
153 a measure of the aggregate higher-order correlations in the population and so may contain  
154 information about the dynamical state of the network. For example, during network oscil-  
155 lations neurons may be mostly either all ON or all OFF together, whereas if the network is  
156 in an asynchronous mode, the population distribution will be narrowly centered around the  
157 mean neuron firing probabilities.

158 The second set of free model parameters are the conditional probabilities that each indi-



vidual neuron is ON, given the total number of neurons active in the population,  $p(x_i = 1|K)$ .  
For shorthand we will write  $p(x_i|K)$  instead of  $p(x_i = 1|K)$  for the remainder of this paper.  
Since there are  $N + 1$  possible values of  $K$ , and  $N$  neurons, there are  $N(N + 1)$  of these  
parameters. However, we know by definition that when  $K = 0$  (all neurons are silent) and  
 $K = N$  (all neurons are active) then we must have  $p(x|K = 0) = 0$  and  $p(x|K = N) = 1$   
respectively. Hence we are left with only  $N(N - 1)$  free parameters. Different neurons  
tend to have different dependencies on the population count, because of their heterogeneity  
in average firing rates (Buzsáki and Mizuseki, 2014) and because some neurons tend to be  
closely coupled to the activity of their surrounding population while others act independently  
(Okun et al., 2015). These two types of neurons have previously been termed ‘choristers’  
and ‘soloists’, respectively.

Once the  $N^2$  total free parameters have been estimated from data (we discuss how this  
can be done below), we can construct the model. It gives the probability of seeing any  
possible activity pattern — even for patterns we have never observed — as

$$p(\{x\}) = \frac{p(k)}{a_k} \left( \prod_{i=1}^N p(x_i|k)^{x_i} [1 - p(x_i|k)]^{1-x_i} \right) \quad \text{where} \quad k = \sum_{i=1}^N x_i \quad (1)$$

where  $a_k$  is a normalizing constant defined as the sum of the probabilities of all  $\binom{N}{k}$  patterns in  
the set  $S(k)$  where  $\sum_{i=1}^N x_i = k$  under a hypothetical model where neurons are conditionally  
independent:

$$a_k = \sum_{\{x\} \in S(k)} \left( \prod_{i=1}^N p(x_i|k)^{x_i} [1 - p(x_i|k)]^{1-x_i} \right) \quad (2)$$

The model can be interpreted as follows: given the estimated synchrony distribution  $p(k)$   
and set of conditional probabilities  $p(x_i|K)$ , we imagine a family of  $N - 1$  probability distri-  
butions  $q_k(\{x\})$ ,  $k \in [1 : N - 1]$  where pattern probabilities are specified by the conditional  
independence models  $q_k(\{x\}) = \prod_{i=1}^N p(x_i|k)^{x_i} [1 - p(x_i|k)]^{1-x_i}$ . Now, using this family of dis-  
tributions we construct one single distribution  $p(\{x\})$  by rejecting all patterns in each  $q_k(\{x\})$   
where  $\sum_{i=1}^N x_i \neq k$ , concatenating the remaining distributions (which cover mutually exclu-

182 sive subsets of the pattern state space), and renormalizing so that the pattern probabilities  
183 sum to one. This implies that for any given activity pattern  $\{x\}$ ,  $p(\{x\}) \propto q_k(\{x\})$ .

184 More intuitively, the model can be thought of as having two component ‘levels’: first, a  
185 high-level component that matches the distribution for the population rate. This component  
186 counts how many neurons are active, ignoring the neural identities and treating all neurons  
187 as homogeneous. The second, low-level component accounts for some of the heterogeneity  
188 between neurons. It asks, given a certain number of active neurons in the population, what  
189 is then the conditional probability that each individual neuron is active? This component  
190 captures two features of the data: the differences in firing rates between neurons, which  
191 can vary over many orders of magnitude (Buzsáki and Mizuseki, 2014), and the relation-  
192 ship between a neuron’s activity and the aggregate activity of its neighbors (Okun et al.,  
193 2015). Both of these features can potentially have large effects on the pattern probability  
194 distribution.

195 In Figure 2, we fit this statistical model to electrophysiology spike data recorded from  
196 a population of 50 neurons in macaque V1 while the animal was presented with a drifting  
197 oriented grating visual stimulus. A section of the original spiking data during stimulus  
198 presentation are shown in Figure 2A, top, along with synthetically generated samples from  
199 the model fitted to these data, below it in red. By definition the model matches the original  
200 data’s population synchrony distribution and conditional probability that each neuron is  
201 active (Figure 2B). In Figure 2C we show the model’s prediction for statistics of the data  
202 that it was not fitted to.

203 First (Figure 2C, left) the model almost exactly matches the average firing rate for each  
204 individual neuron. This is a direct consequence of the way the model is constructed and  
205 follows from the fits of the two sets of parameters. Hence the model can captures the  
206 heterogeneity in neural firing rates.

207 Second, we compare the pairwise correlations between neurons from the original data  
208 with those from the data synthetically generated by sampling the model (Figure 2C, center).

209 Here we see only a partial match. Although the model captures the coarse features of the  
210 correlation matrix, it does not match the fine-scale structure on a pair-by-pair basis. For this  
211 example, the  $R^2$  value between the model and data pairwise correlations was 0.52 (Appendix  
212 Figure 1). In particular, the model accounts exactly for the population's mean pairwise  
213 correlation, because this is entirely due to the fluctuations in the population activity. We  
214 can demonstrate this effect directly by first subtracting away the covariance in the original  
215 data that can be accounted for by the model and then renormalizing to get a new correlation  
216 matrix (Appendix Figure 1). Indeed this new correlation matrix is zero mean, but retains  
217 much of the fine-scale structure between certain pairs of neurons. This implies that the  
218 model captures only coarse properties of the pairwise correlations.

219 Finally, the model does not match at all the temporal correlations present in the original  
220 data (Figure 2C, right), since it assumes that each time bin is interchangeable. Note that  
221 this limitation is an ingredient of the model, not a failing *per se*. This property is shared with  
222 many other statistical methods commonly applied to neural population data (Schneidman  
223 et al., 2006; Macke et al., 2009; Cunningham and Yu, 2014; Okun et al., 2015).

224 These results show which statistics of the data that the population tracking model does  
225 and does not account for. Although other statistical models may more accurately account  
226 for pairwise or temporal correlation structure in the data, they typically do not scale well  
227 to large  $N$  (Table 1). In the remainder of the paper we explore the model's behavior on  
228 large  $N$  data, and show how we can take advantage of the particular form of the model to  
229 robustly estimate some high-level measures of the activity statistics, including the entropy  
230 of the data and the divergence between pairs of data sets. Since these measures are typically  
231 difficult or impossible to estimate using other common statistical models in the field, the  
232 population tracking model may allow experimenters to ask neurobiological questions that  
233 would be otherwise intractable.

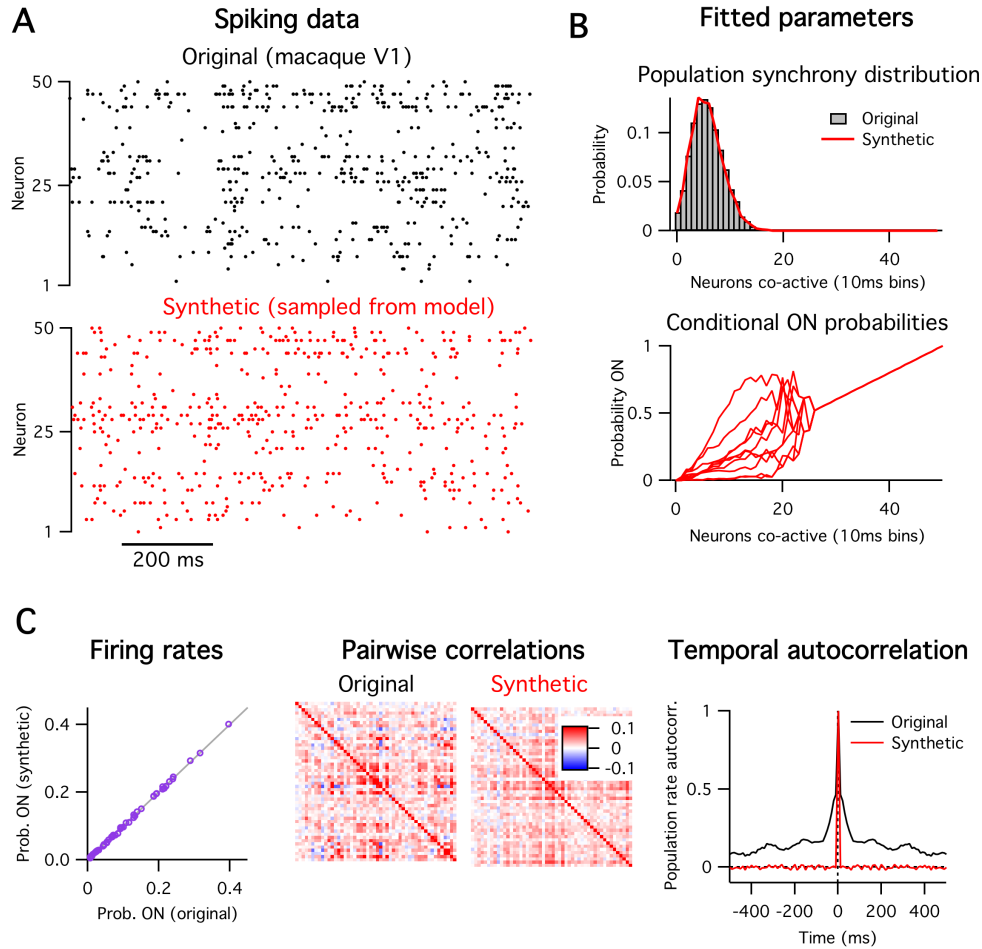

Fig. 2: **A:** Original spiking data (top, black) and synthetic data generated from model (bottom, red).  
**B:** The model's fitted parameters. First, the population synchrony distribution (top), and second the conditional probability that each neuron is ON given the number of neurons active. The conditional ON probabilities of only ten of the fifty neurons are shown for clarity. The curves converge to a straight line for  $k \gtrsim 25$  because those values of  $k$  were not observed in the data, so the parameter estimates collapse to the prior mean.  
**C:** Comparison of other statistics of the data with the model's predictions. The model gives an exact match of the single neuron firing rates (left), a partial match with the pairwise correlations (center), but does not match the data's temporal correlations (right).

## 2.2 Fitting the model to data.

We now outline a procedure for fitting the statistical model's  $N^2$  free parameters to neural population data. We assume that the data have already been preprocessed as discussed above and are in the format of either a binary  $N \times T$  matrix  $\mathbf{M}$ , or as a two-column integer list of active timepoints and their associated neuron IDs. We found that parameter fitting was fast; for example, fitting parameters to data from a one hour recording of 140 neurons was done on a standard desktop in  $\sim 1$  minute.

### 2.2.1 Fitting the population activity distribution

The first set of parameters are the  $N$  values specifying the probability distribution for the number of neurons active  $p(k)$ . In principle  $K$  can take on any of the  $N+1$  values from 0 (the silent state) to  $N$  (the all ON state), but since we have the constraint that the probability distribution must normalize to one, one parameter can be calculated by default so we need only fit  $N$  free parameters to fully specify the distribution. The most straightforward way to do this is by histogramming, which gives the maximum likelihood parameter estimates. We simply count how many neurons are ON at each of the  $T$  timepoints to get  $[K(t=1), K(t=2) \dots K(t=T)]$ , then histogram this list and normalize to one so that our estimate  $\hat{p}(k) = c_k/T$  where  $c_k$  is the count of the number of timepoints where  $k$  neurons were active.

If the data statistics are sufficiently stationary relative to the timescale of recording, then the error on each parameter individually scales  $\sim 1/\sqrt{T}$  and independent of  $N$ . However, the relative error on each  $\hat{p}(k)$  also scales  $\sim \sqrt{\frac{1-p(k)}{p(k)}}$ , which implies large errors for rare values of  $K$ , when  $p(k)$  is small. Since neural activity is often sparse, we expect it to be quite common to observe small  $p(k)$  for large  $K$ , close to  $N$  (neurons are rarely all ON together). To avoid a case where we naively assign a probability of zero to a certain  $p(k)$  just because we never observe it in our finite data, we propose adding some form of regularization on the distribution  $p(k)$ . A common method for regularization is to assume a prior distribution for  $p(k)$ , then multiply it with the likelihood distribution from the data to compute the final

posterior estimate for the parameters following Bayes rule. If for convenience we assume a Dirichlet prior (conjugate to the multinomial distribution), then the posterior mean estimate for each parameter simplifies to

$$\hat{p}(k, \alpha) = \frac{c_k + \alpha}{T + N\alpha}$$

where  $\alpha$  is a small positive constant. Note that this procedure is equivalent to adding the same small artificial count  $\alpha$  to each empirical count  $c_k$ . For the examples presented in this study, we set  $\alpha = 0.01$ .

### 2.2.2 Fitting the conditional ON probabilities for each neuron

The second step is to fit the  $N^2 - N$  unconstrained conditional probabilities that each neuron is ON given the total number of active neurons in the population,  $p(x|K)$ . The simplest method to fit these parameters is by histogramming, similar to the above case for fitting the population activity distribution. In this case we cycle through each value of  $K$  from 1 to  $N - 1$ , find the subset of timepoints at which there were exactly  $k$  neurons active, and count how many times each individual neuron was active at those timepoints,  $d_{i,k}$ . The maximum likelihood estimate for the conditional probability of the  $i$ th neuron being ON given  $k$  neurons in the population active is just  $\hat{p}(x_i|k) = d_{i,k}/T_k$ , where  $T_k$  is the total number of timepoints where  $k$  neurons were active.

As before, given that some values of  $K$  are likely to be only rarely observed we should also add some form of regularization to our estimates for  $p(x|K)$ . We want to avoid erroneously assigning  $p(x_i|K) = 0$ , or any  $p(x_i|K) = 1$  just because we had few data points available. Since  $x_i$  here is a Bernoulli variable, we regularize following standard Bayesian practice by setting a Beta prior distribution over each  $p(x_i|K)$  because it is conjugate to the binomial distribution. Under this model the posterior mean estimate for the parameters are

$$\hat{p}(x_i|k, \beta_0, \beta_1) = \frac{d_{i,k} + \beta_1}{\beta_0 + \beta_1 + T_k}$$

282 Using the Beta prior comes at the cost of setting its two hyperparameters,  $\beta_1$  and  $\beta_2$ . We  
283 eliminate one of these free hyperparameters by constraining the prior's mean to be equal to  
284  $k/N$ . This will pull the final parameter estimates towards the values that they would take  
285 if all neurons were homogeneous. The other free hyperparameter is the variance or width  
286 of the prior. This dictates how much the final parameter estimate should reflect the data:  
287 the wider the prior is, the closer the posterior estimate will be to the naive empirical data  
288 estimate. We found in practice good results if the variance of this prior scaled with the  
289 variance of the Bernoulli variables,  $\propto \mu(1 - \mu)$  where  $\mu = k/N$ . This guaranteed that the  
290 variance vanished as  $k$  became near 0 or  $N$ . For the examples presented in this study, we  
291 set the prior variance  $\sigma^2 = 0.5\mu(1 - \mu)$ , and  $\beta_1 = \frac{\mu}{\sigma^2}(\mu - \mu^2 - \sigma^2)$  and  $\beta_2 = \beta_1(\frac{1}{\mu} - 1)$ .

292 An alternative method for fitting  $p(x|K)$  would be to perform logistic regression. Al-  
293 though in principle logistic regression should work well since we expect  $p(x|K)$  to typically  
294 be both monotonically increasing and correlated across neighboring values of  $k$ , we found  
295 in practice that as long as sufficient data were available it gave inferior fits compared with  
296 the histogram method discussed above. However for data sets with limited time samples  
297 logistic regression might indeed be preferable. The other benefit would be that since logistic  
298 regression requires fitting of only two parameters per regression, if employed it would reduce  
299 the total number of the model's free parameters from  $N^2$  to only  $3N$ .

### 300 2.2.3 Calculating the normalization constants

301 The above expression for pattern probabilities includes a set of  $N - 1$  constants  $A_k =$   
302  $\{a_1, a_2 \dots a_{N-1}\}$  that are necessary to ensure that the distribution sums to one. These  
303 constants are not fit directly from data but instead follow from the parameters.

304 Each  $a_k$  is calculated separately for each value of  $k$ . They can be calculated in at least  
305 four ways. The most intuitive method is via the brute force enumeration of the probabilities  
306 of all  $\binom{N}{k}$  possible patterns where  $k$  neurons are active, then summing the probabilities, as  
307 given by eq. 2. Although this method is exact, it is only computationally feasible if  $\binom{N}{k}$

308 is not too large, which can occur quite quickly when analyzing data from more than 20–30  
 309 neurons. The second method to estimate  $a_k$  is to draw  $N$  Bernoulli samples for many trials  
 310 following the probabilities given by  $p(x|k)$ , then count the fraction of trials in which the  
 311 number of active neurons did in fact equal  $k$ . This method is approximate and inaccurate  
 312 for large  $N$  because  $a_k \rightarrow 0$  as  $N \rightarrow \infty$ .

313 The third method is to estimate  $a_k$  using importance sampling. We can rewrite eq. 2 as

$$\begin{aligned} a_k &= \binom{N}{k} \frac{\sum_{\{x\} \in S(k)} \left( \prod_{i=1}^N p(x_i|k)^{x_i} [1 - p(x_i|k)]^{1-x_i} \right)}{\binom{N}{k}} \\ &= \binom{N}{k} \mathbb{E}[\varphi\{x\}] \end{aligned}$$

314 where  $\{x\}$  is a sample from the uniform distribution on  $S(k)$ , and  $\varphi(\{x\}) = \prod_{i=1}^N p(x_i|k)^{x_i} [1 -$   
 315  $p(x_i|k)]^{1-x_i}$ . If we have  $m$  such samples  $\{x^{(1)}\}, \{x^{(2)}\}, \dots, \{x^{(m)}\}$ , then by the law of large  
 316 numbers

$$\frac{1}{m} \sum_{j=1}^m \varphi(\{x^{(j)}\}) \rightarrow \mathbb{E}[\varphi(\{x\})] = \frac{a_k}{\binom{N}{k}},$$

317 so by implication

$$\sum_{j=1}^m \varphi(\{x^{(j)}\}) \approx m \mathbb{E}[\varphi(\{x\})] = \frac{a_k m}{\binom{N}{k}}.$$

318 If we fit a straight line in  $m$  to the partial sums  $\hat{y} = \sum_{j=1}^m \varphi(\{x^{(j)}\})$  by linear regression, say  
 319  $\hat{y} = c_1 m + c_0$ , we get

$$c_1 m + c_0 \approx \sum_{j=1}^m \varphi(\{x^{(j)}\}) \approx \frac{a_k m}{\binom{N}{k}}.$$

320 Assuming that  $\hat{y}(m=0) = 0$ , then the intercept  $c_0 = 0$ , so we are left with

$$c_1 \binom{N}{k} \approx a_k.$$

321 Finally, a fourth method follows from a procedure we present below, for estimating a low-  
 322 dimensional model of the entire pattern probability distribution as a sum of log-normals.



#### 323 **2.2.4 The implicit prior on the pattern probability distribution**

324 By assuming a prior distribution over all of our parameters, we are implicitly assuming a  
325 prior distribution over the model's predicted pattern probabilities. What does that look  
326 like? For the population activity distribution we have chosen a uniform value of  $\alpha$  across all  
327 values of  $k$ , implying that our prior expects each level of population activity to be equally  
328 likely. The prior imposed on the second set of parameters, the  $p(x|K)$ 's, would assign each  
329 neuron an identical conditional ON probability of  $k/N$ . Although the second set of priors  
330 is maximal entropy given the first set, it is important to note that the uniform prior over  
331 population activity is not maximum entropy, since each value of  $k$  carries a different number  
332 of patterns. Hence for large  $N$ , the prior will be concentrated on patterns where few ( $k$  near  
333 zero) or many ( $k$  near  $N$ ) neurons are active.

334 A geometrical view of the effect of the priors can be given as follows. Since our  $N^2$   
335 parameters can each be written as a weighted linear sum of the  $2^N$  pattern probabilities, they  
336 specify  $N^2$  constraint hyperplanes for the solution in the  $2^N$ -dimensional space of pattern  
337 probabilities. There are also other constraint hyperplanes which follow from constraints  
338 inherent to the problem, such as the fact that the pattern probabilities must sum to one,  
339 and that  $p(x|K = 0) = 0$ , etc. Since  $N^2 < 2^N$  (for all  $N > 4$ ) there are an infinite number  
340 of solutions that satisfy the constraints. Our final expression for the pattern probabilities  
341 is just a single point on the intersection of this set of hyperplanes. The effect of including  
342 priors on the parameters is to shift the hyperplanes so that our final solution is closer to  
343 prior pattern probabilities than that directly predicted by the data. In doing so it ensures  
344 all patterns are assigned a non-zero probability of occurring, as any sensible model should.

### 345 **2.3 Sampling from model given parameters**

346 Given the fitted parameters, sampling is straightforward using the following procedure:

- 347 1. Draw a sample for the integer number of neurons active  $k_{sample}$  from the range  $\{0, \dots, N\}$

348 according to the discrete distribution  $p(k)$ . This can be done by drawing a random  
349 number from the uniform distribution then mapping that value onto the inverse of the  
350 cumulative of  $p(k)$ .

351 2. Draw  $N$  independent Bernoulli samples  $\mathbf{x} = \{x_1, x_2 \dots x_N\}$ , one for each neuron, with  
352 the probability for the  $i$ th neuron given by  $p(x_i|k_{sample})$ . This is a candidate sample.

353 3. Count how many neurons are active in the candidate sample:  $k_{sample}^* = \sum_{i=1}^N x_i$ . If  
354  $k_{sample}^* = k_{sample}$ , accept the sample. If  $k_{sample}^* \neq k_{sample}$ , reject the sample and return  
355 to step 2.

356 One benefit of this model is that since the sampling procedure is not iterative, sequential  
357 samples are completely uncorrelated.

## 358 **2.4 Estimating the full pattern probability distribution, entropy, and** 359 **divergence.**

### 360 **2.4.1 Low-dimensional approximation to pattern probability distribution**

361 So far we have shown how to fit the model's parameters, calculate the probability of any  
362 specific population activity pattern, and sample from the model. Depending on the neu-  
363 robiological question an experimenter might also wish to use this model to calculate the  
364 probabilities of all possible activity patterns, either to examine the shape of the distribution  
365 or to compute some measure that is a function of the entire distribution. One such measure,  
366 for example, is the joint population entropy  $H$  used in information theoretic calculations,  
367 
$$H = - \sum_{i=1}^{2^N} p(\{x\}_i) \log_2 p(\{x\}_i).$$

368 For small populations of neurons  $N \lesssim 20$ , the probabilities of all  $2^N$  possible activity  
369 patterns can be exhaustively enumerated. However, for larger populations this brute force  
370 enumeration is not feasible due to limitations on computer storage space. For example,  
371 storing  $2^{100} \sim 10^{30}$  decimal numbers on a computer with 64-bit precision would require

372  $\sim 10^{19}$  terabytes of storage space. Hence for most statistical models, such as classic pairwise  
373 maximum entropy models, this problem is either difficult or intractable (Broderick et al.,  
374 2007; although see Schaub and Schultz, 2012). Fortunately, the particular form of the  
375 model we propose implies that the distribution of pattern probabilities it predicts will, for  
376 sufficiently large  $k$  and  $N$ , tend towards the sum of a set of log-normal distributions, one  
377 for each value of  $k$  (Figure 3B–C), as we explain below. Since the log-normal distribution is  
378 specified by only 2 parameters, we can fit this approximate model with only  $3N$  parameters  
379 total, which can be readily stored for any reasonable value of  $N$ .

380 We derive the sum-of-lognormals distribution model as follows. First we take the log of  
381 both sides of eq.1 to get:

$$\begin{aligned} \log p(\{x\}) &= \log p(k) + \sum_i^N \log [p(x_i|k)^{x_i} (1 - p(x_i|k))^{(1-x_i)}] - \log a_k & (3) \\ &= \log p(k) + \sum_i^k \log p(x_i|k) + \sum_j^{N-k} \log(1 - p(x_j|k)) - \log a_k \end{aligned}$$

382 where the second and third terms correspond to sums over the  $k$  active and  $(N - k)$  inactive  
383 neurons in  $\{x\}$  respectively. Note that this equation is only valid for the cases where  $k \geq$   
384 1. For clarity in what follows, we will temporarily represent  $p(\{x\}) = \theta$  and  $p(\{x\}|k) =$   
385  $\theta_k$ . Now let us consider the set  $L_k$  of the log-probabilities for all  $\binom{N}{k}$  patterns for for a  
386 given level of population activity  $k$ ,  $L_k = \{\log(p(\{x\}))\}_k = \{\log(\theta)\}_k$  where  $\sum_{i=1}^N x_i =$   
387  $k$ . Since the population tracking model assumes that neurons are (pseudo) conditionally  
388 independent, then for sufficiently large  $N$ , according to the central limit theorem the second  
389 and third terms in the sum in eq. 3 will be normally distributed with some mean  $\mu(k)$  and  
390 variance  $\sigma^2(k)$ , no matter what the actual distribution of  $p(x_i|K)$ 's is. Hence, if we were  
391 to histogram the log-probabilities  $\{\log(\theta)\}_k$  of all patterns for a given  $k$ , their distribution  
392 could be approximated by the sum of two Gaussians and two constants:

$$p(\log(\theta))_k \approx \log p(k) + \mathcal{N}(\mu_{ON}(k), \sigma_{ON}^2(k)) + \mathcal{N}(\mu_{OFF}(k), \sigma_{OFF}^2(k)) - \log a_k. \quad (4)$$

393 Note that this is a distribution over log-pattern probabilities: it specifies the fraction of all  
394 neural population activity patterns that share a particular log-probability of being observed.

395 The two normal distribution means are given by

$$\begin{aligned} \mu_{ON}(k) &= k \langle \log p(x|k) \rangle \\ \mu_{OFF}(k) &= (N - k) \langle \log(1 - p(x|k)) \rangle \end{aligned}$$

396 and the variances are

$$\begin{aligned} \sigma_{ON}^2(k) &= k \left( \frac{N - k - 1}{N - 1} \right) \text{var}[\log p(x|k)] \\ \sigma_{OFF}^2(k) &= (N - k) \left( \frac{k - 1}{N - 1} \right) \text{var}[\log(1 - p(x|k))] \end{aligned}$$

397 where the fractional terms in the variance equations are corrections because we are drawing  
398 without replacement from a finite population. Finally since we are adding two random  
399 variables (the second and third terms in 4), we also need to account for their covariance.  
400 Unfortunately, the value of this covariance depends on the data, and unlike the means and  
401 variances we could find no simple formula to predict it directly from the parameters  $p(x|k)$ .  
402 Hence it should be estimated empirically by drawing random samples from the coupled  
403 distributions  $\mathcal{N}(\mu_{ON}(k), \sigma_{ON}^2(k))$  and  $\mathcal{N}(\mu_{OFF}(k), \sigma_{OFF}^2(k))$ , and computing the covariance  
404 of the samples.

405 Although the lognormal approximation is valid when both  $K$  and  $N$  are large, the ap-  
406 proximation will become worse when  $K$  is near 0 and  $N$ , no matter how large  $N$  is. This  
407 is problematic because neural data is often sparse, so small values of  $K$  are expected to be  
408 common and hence important to accurately model. Indeed we found empirically that the

distribution of log-pattern probabilities at small  $K$  can become substantially skewed, or, if the data come from neurons that include distinct subpopulations with different firing rates, even multimodal. We suggest that the experimenter examines the shape of the distribution by histogramming the probabilities of a large number of randomly chosen patterns to assess the appropriateness of the lognormal fit. The validity of the log-normal approximation can be formally assessed using, for example, the Lilliefors or Anderson-Darling tests. If the distribution is indeed non-lognormal for certain values of  $K$ , we suggest application of either or both of the following two *ad hoc* alternatives. First, for very small values of  $K$  (say  $k \lesssim 3$ ), then the number of patterns at this level of population synchrony  $\binom{N}{k} = \frac{N!}{k!(N-k)!}$  should also be small enough to permit brute force enumeration of all such pattern probabilities. Second, for slightly larger values of  $K$  ( $3 \lesssim k \lesssim 10$ ), the distribution can be empirically fit by alternative low-dimensional parametric models, for example a mixture-of-gaussians (MoG), which should be sufficiently flexible to capture any multimodality or skewness. In practice we found that MoG model fits are typically improved by initializing the parameters with standard clustering algorithms, such as K-means.

One important precaution to take when fitting any parametric model to the pattern probability distributions (be it lognormal, MoG, or otherwise) is to make sure that the resulting distributions are properly normalized so that the product of the integral of the approximated distribution of pattern probabilities for a given  $k$ ,  $p(\theta)_k$ , with the total number of possible patterns at that  $k$ ,  $\binom{N}{k}$ , does indeed equal the  $p(k)$  previously estimated from data:

$$\binom{N}{k} \int_0^1 p(\theta)_k d\theta = p(k)$$

Although in principle this normalization should be automatic as part of the fitting procedure, even small errors in the distribution fit due to finite sampling can lead to appreciable errors in the normalization, due to the exponential sensitivity of the pattern probability sum on the fit in log co-ordinates. The natural place to absorb this correction is in the constant  $a_k$ , which in any case has to be estimated empirically so it will carry some error. Hence

435 we suggest that when performing this procedure, estimation of  $a_k$  should be left as the final  
436 step, when it can be calculated computationally as whatever value is necessary to satisfy the  
437 above normalization.

#### 438 **2.4.2 Calculating population entropy**

439 Given the above reduced model of the pattern probability distribution we could compute  
440 any desired function of the pattern probabilities, for example the mean or median pattern  
441 probability, the standard deviation, etc. One example measure that is relevant for informa-  
442 tion theory calculations is Shannon's entropy,  $H = -\sum_i p_i \log_2 p_i$ , measured in bits. This  
443 can be calculated by first decomposing the total entropy as

$$H = H_k + H(p(\{x\}|k)) = H_k + H(\theta)_k$$

444 where  $H_k = -\sum_{k=0}^N p(k) \log_2 p(k)$  is the entropy of the population synchrony distribution  
445 and  $H(\theta)_k = \sum_{k=0}^N p(k) H(\theta_k)$  is the conditional entropy of the pattern probability distri-  
446 bution given  $K$ . Given the sum-of-lognormals reduced model of the pattern probability  
447 distribution, the total entropy (in bits) of all patterns for a given  $k$  is

$$H(\theta_k) = \binom{N}{k} \int_0^1 p(\theta)_k \times [\theta_k \log_2 \theta_k] d\theta$$

448 This can be calculated by standard numerical integration methods separately for each pos-  
449 sible value of  $K$ .

450 In the homogeneous case where all neurons are identical, all  $\binom{N}{k}$  patterns for a given  $K$   
451 will have equal probability of occurring,  $p(\{x\}|K = k) = p(k)/\binom{N}{k}$ . This situation maximizes  
452 the second term in the entropy expression, and simplifies it to  $H_{pop} = \sum_{k=0}^N p(k) \log_2 \frac{\binom{N}{k}}{p(k)}$ .

453 To demonstrate these methods we calculated the probability distribution across all  $2^{50} \approx$   
454  $10^{15}$  possible population activity patterns, and the population entropy, for an example spiking  
455 data set recorded from fifty neurons in macaque primary visual cortex. The presentation of

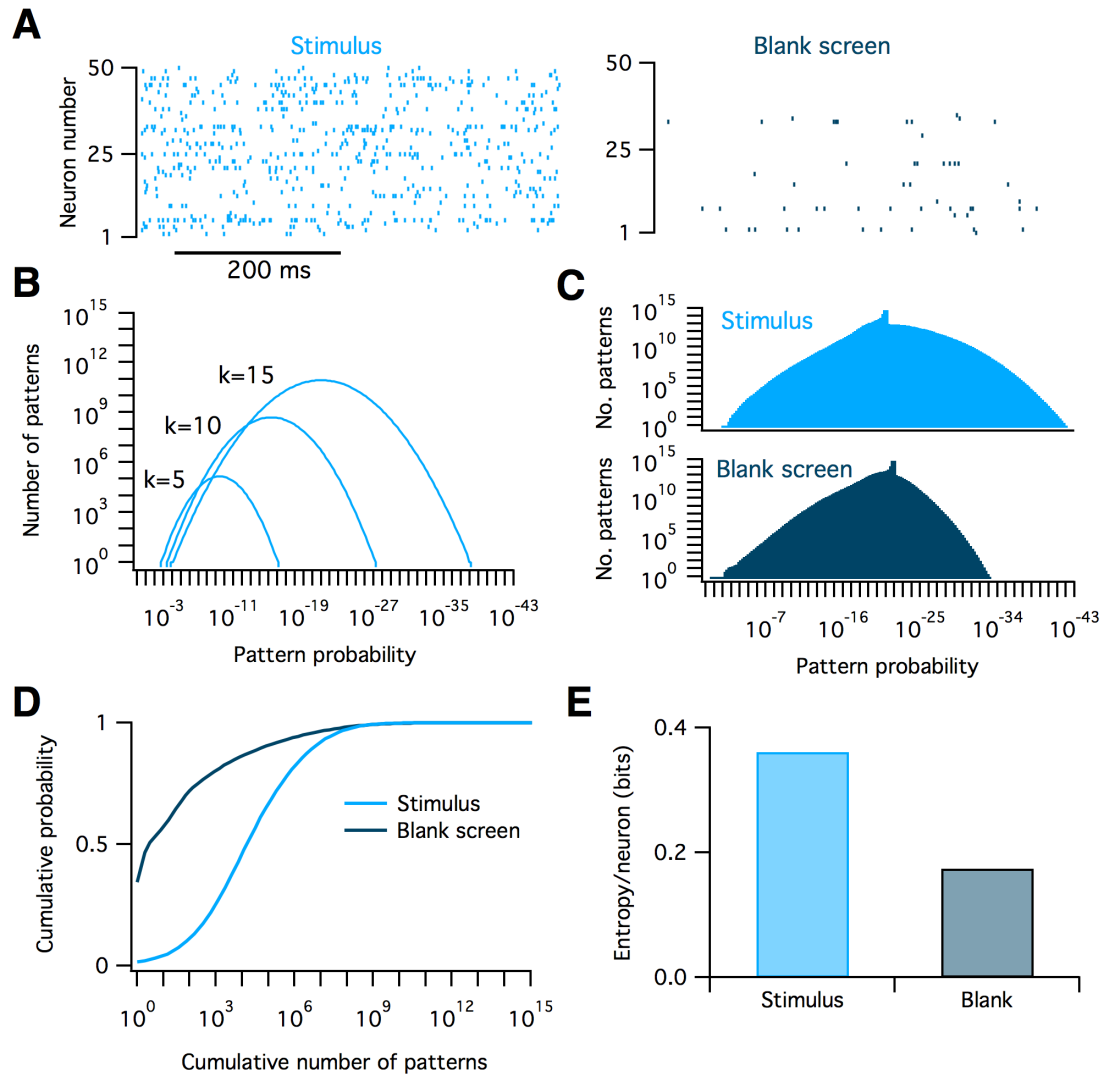

Fig. 3: Calculating the distribution of population pattern probabilities and entropy for spiking data from macaque visual cortex.

**A:** Example raster plots of spiking data from 50 neurons in macaque V1 in response to static oriented bar stimulus (left) and a blank screen (right).

**B:** The distribution of pattern probabilities for varying numbers of neurons is estimated for various values of the numbers of neurons active,  $k$ .

**C:** Summed total distribution of pattern probabilities for data recorded during stimulus (top, light blue) and blank screen (bottom, dark blue) conditions. The small bumps on top of the distributions are due to values of  $k$  which were unobserved in the data. Since the model assumes all patterns at these values are equally probable, they lead to the introduction of several sharp delta peaks to the pattern probability distribution.

**D:** The cumulative probability as a function of the cumulative number of patterns considered. Note that many-fold fewer activity patterns account for the bulk of the probability mass in the blank screen condition compared to during the stimulus.

**E:** Entropy per neuron of the pattern probability distribution for both conditions.

456 a visual stimulus increases the firing rates of most neurons as compared to a blank screen  
457 (Figure 3A). We found that this increase in firing rates lead to a shift in the distribution  
458 of pattern probabilities (Figure 3C–D) and an increase in population entropy (Figure 3E).  
459 Notably, a tiny fraction of all possible patterns account for almost all the probability mass.  
460 For the visually evoked data, around  $10^7$  patterns accounted for 90% of the total probability,  
461 which implies that only  $\sim \frac{10^7}{10^{15}} = 0.000001\%$  of all possible patterns are routinely used.  
462 Although this result might not seem surprising given that neurons fire sparsely, any model  
463 that assumed independent neurons would likely overestimate this fraction because such a  
464 model would also overestimate the neural population’s entropy (see below). These results  
465 demonstrate that the population tracking model can detect aspects of neural population  
466 firing that may be difficult to uncover with other methods.

### 467 **2.4.3 Calculating the divergence between model fits to two data sets**

468 Many experiments in neuroscience involve comparisons between neural responses under dif-  
469 ferent conditions: for example the firing rates of a neural population before and after applica-  
470 tion of a drug, or the response to a sensory stimulus in the presence or absence of optogenetic  
471 stimulation. Therefore it would be desirable to have a method for quantifying the differ-  
472 ences in neural population pattern probabilities between two conditions. Commonly used  
473 measures for differences of this type are the Kullback-Leibler divergence, and the related  
474 Jensen-Shannon divergence (Cover and Thomas, 2006; Berkes et al., 2011). Calculation of  
475 either divergence involves a point-by-point comparison of the probabilities of each specific  
476 pattern under the two conditions. For small populations, this can be done by enumerating  
477 the probabilities of all possible patterns, but how would it work for large populations? On  
478 the face of it, the above approximate method for entropy calculation cannot help here, be-  
479 cause that involved summarizing the distribution of pattern probabilities while losing the  
480 identities of individual patterns along the way. Fortunately the form of the statistical model  
481 we propose does allow for an approximate calculation of the divergence between two pattern



482 probability distributions, as follows.

483 The Kullback-Leibler divergence from one probability distribution  $p(i)$  to another prob-  
484 ability distribution  $q(i)$  is defined as

$$D_{KL}(p||q) = \sum_i p(i) \log_2 \frac{p(i)}{q(i)} \quad (5)$$

485 We can decompose this sum into  $N + 1$  separate sums over the subsets of patterns with  $K$   
486 neurons active:

$$D_{KL}(p||q) = \sum_{k=0}^N D_{KL}(p||q)_k$$

487 Hence we just need a method to compute  $D_{KL}(p||q)_k$  for any particular value of  $k$ . Notably,  
488 the term to be summed over in equation 5 can be seen as the product of two components:  
489  $p(i)$  and  $\log_2 \frac{p(i)}{q(i)}$ . In the preceding section we showed that for sufficiently large  $k$  and  $N$ ,  
490 the distribution of pattern probabilities at a fixed  $K$  is approximately log-normal because  
491 of our assumption of conditional independence between neurons. Hence the first component  
492  $p(i)$  can be thought of as a continuous random variable that we will denote  $X_1$ , drawn from  
493 the log-normal distribution  $f(x_1)$ . Because  $p(i)$  represents pattern probabilities, the range of  
494  $f(x_1)$  is  $[0, 1]$ . The second component,  $\log_2 \frac{p(i)}{q(i)}$ , in contrast, can be thought of as a continuous  
495 random variable that we will denote  $X_2$ , that is drawn from the normal distribution  $g(x_2)$ ,  
496 because by the same argument  $\frac{p(i)}{q(i)}$  is approximately log-normally distributed, so its logarithm  
497 is normally distributed. Since this term is the logarithm of the ratio of two positive numbers,  
498 the range of  $g(x_2)$  is  $[-\infty, \infty]$ . Now the term to be summed over can be thought of as  
499 the product of two continuous and dependent random variables  $Y = X_1 X_2$ , with some  
500 distribution  $h(y)$ .

501 Our estimate for the KL divergence  $\hat{D}_{KL}$  for a given  $k$  is then just the number of patterns  
502 at that value of  $k$  times the expected value of  $Y$ :

$$\hat{D}_{KL}(p||q)_k = \mathbb{E}[D_{KL}(p||q)_k] = \binom{N}{k} \int_{-\infty}^{\infty} y h(y) dy$$

$$\begin{aligned} &= \binom{N}{k} \mathbb{E}[Y] \\ &= \binom{N}{k} \mathbb{E}[X_1 X_2] \\ &= \binom{N}{k} (\mathbb{E}[X_2] \mathbb{E}[X_2] + \text{Cov}[X_1, X_2]) \end{aligned}$$

503 The three new terms in the last expression,  $\mathbb{E}[X_1]$ ,  $\mathbb{E}[X_2]$ , and  $\text{Cov}[X_1, X_2]$ , can be estimated  
504 empirically by sampling a set of matched values of  $p(\{x\}_i)$  and  $q(\{x\}_i)$  from a large randomly  
505 chosen subset of the  $\binom{N}{k}$  patterns corresponding to a given value of  $k$ .

## 506 2.5 Model fit convergence for large numbers of neurons

507 To test how the model scales with numbers of neurons and time samples, we fit it to syn-  
508 thetic neural population data from a different established statistical model, the Dichotomized  
509 Gaussian (DG) (Macke et al., 2009). The DG model generates samples by thresholding a  
510 multivariate Gaussian random variable in such a way that the resulting binary values matches  
511 desired target mean ON probabilities and pairwise correlations. The DG is a particularly  
512 suitable model for neural data, because has been shown that the higher-order correlations  
513 between ‘neurons’ in this model reproduce many of the properties of high-order correlations  
514 seen in real neural populations recorded *in vivo* (Macke et al., 2011b). This match may  
515 come from the fact that thresholding behavior of the DG model mimics the spike threshold  
516 operation of real neurons.

517 For this section we used the DG to simulate the activity of two equally sized populations  
518 of neurons,  $N_1 = N_2 = N/2$ , one population with a low firing rate of  $r_1 = 0.05$  and the  
519 other with a higher firing rate of  $r_2 = 0.15$ . The correlations between all pairs of neurons  
520 were set at  $\rho = 0.1$ . We first estimated ground truth pattern probability distributions by  
521 histogramming samples. Although there are  $2^N$  possible patterns, the built-in symmetries in  
522 our chosen parameters meant that all patterns with the same number of neurons active from  
523 each group  $k_1$  and  $k_2$  share identical probabilities. Hence the task amounted to estimating

524 only the joint probabilities  $p(k_1, k_2)$  of the  $(N+1)^2$  configurations of having  $k_1$  and  $k_2$  neurons  
525 active. We generated as many time samples as was needed for this probability distribution  
526 to converge ( $T > 10^9$ ) for varying numbers of neurons ranging from  $N = 10$  to  $N = 1000$ .

527 We then fit both our proposed model and several alternatives to further sets of samples  
528 from the DG, varying  $T$  from 100 to 1,000,000. Finally, we repeated the fitting procedure  
529 on many sets of fresh samples from the DG to examine variability in model fits across trials.  
530 To assess the quality of the fits we use the population entropy as a summary statistic. We  
531 compared the entropy estimates of the population tracking model with five alternatives:

- 532 1. Independent neuron model: neurons are independent, with individually fit mean firing  
533 rates estimated from the data. This model has  $N$  parameters.
- 534 2. Homogeneous population model: neurons are identical but not independent. The  
535 model is constrained only by the population synchrony distribution  $p(k)$ , as estimated  
536 from data. This model has  $N + 1$  parameters.
- 537 3. Histogram. The probability of each population pattern is estimated by the counting  
538 the number of times it appears and normalizing by  $T$ . This model has  $2^N$  parameters.
- 539 4. Singleton entropy estimator (Berry II et al., 2013): this model uses the histogram  
540 method to estimate the probabilities of observed patterns in combination with an  
541 independent neuron model for the unobserved patterns. We implemented this method  
542 using our own MATLAB code.
- 543 5. Archer-Park-Pillow (APP) method (Archer et al., 2013): a Bayesian entropy estimator  
544 that combines the histogram method for observed patterns with a Dirichlet prior con-  
545 strained by the population synchrony distribution. We implemented this method using  
546 the authors' publicly available MATLAB code (<http://github.com/pillowlab/CDMentropy>).

547 We chose these models for comparison because they are tractable to implement. Although  
548 it is possible that other statistical approaches such as the maximum entropy model family

549 would more accurately approximate the true data distribution, it is difficult to estimate the  
550 joint entropy from these models for data from  $\gtrsim 20$  neurons (Table 1).

551 In Figure 4 we plot the mean and standard deviation of the entropy/neuron estimates  
552 for this set of models as a function of the number of neurons (panels B and C) and number  
553 of time samples (panels D and E) analyzed. The key observation is that across most values  
554 of  $N$  and  $T$ , the majority of methods predict entropy values different from the true value  
555 (dashed line in all plots). These errors in the entropy estimates come from three sources:  
556 the finite sample variance, the finite sample bias and the asymptotic bias.

557 The finite sample variance is the variability in parameter estimates across trials from  
558 limited data, shown in Figure 4C and E as the standard deviation in entropy estimates.  
559 Notably, the finite sample variance decreases to near zero for all models within  $10^5$ – $10^6$   
560 time samples, and is approximately independent of the number of neurons analyzed for the  
561 population tracking method (Figure 4C and E).

562 The second error, the finite sample bias, arises from the fact that entropy is concave  
563 function of  $p(\{x\})$ . This bias is downward in the sense that the mean entropy estimate  
564 across finite-data trials will always be less than the true entropy:  $\mathbb{E}[H(\hat{p}\{x\})] \leq H(p(\{x\}))$ .  
565 Intuitively, any noise in the parameter estimates will tend to make the predicted pattern  
566 probability distribution more lumpy than the true distribution, so reducing the entropy  
567 estimate. Although this error becomes negligible for all models within a reasonable number  
568 of time samples for small numbers of neurons ( $N \approx 10$ ) (Figure 4B and D), it introduces large  
569 errors for the histogram, singleton and APP methods for larger populations. In contrast to  
570 the finite sample variance, the finite sample bias depends strongly on the number of neurons  
571 analyzed for all models, typically becoming worse for larger populations.

572 The third error, the asymptotic bias, is the error in entropy estimate that would persist  
573 even if infinite time samples were available. It is due to a mismatch between the form of  
574 the statistical model used to describe the data and the true underlying structures in the  
575 data. In Figure 4, this error is present for all models that do not include a histogram

576 component: the independent, homogeneous population and population tracking models.  
577 Because the independent and homogeneous population models are maximum entropy given  
578 their parameters, their asymptotic bias in entropy will always be ‘upward’, meaning that  
579 these models will always overestimate the true entropy, given enough data. They are too  
580 simple to capture all of the structure in the data. Although population tracking method may  
581 have either an upward or downward asymptotic bias, depending on the structure of the true  
582 pattern probability distribution, for the example cases we examined this error was small in  
583 magnitude.

584 The independent, homogeneous population, and population tracking models converged  
585 to their asymptotic values within  $10^4$ – $10^5$  time samples (Figure 4D–E). The histogram,  
586 singleton and APP methods, in contrast, performed well for small populations of neurons,  
587  $N < 20$ , but strongly underestimated the entropy for larger populations (Figure 4B, D),  
588 even for  $T = 10^6$  samples.

589 The independent, homogeneous population and population tracking models consistently  
590 predicted different values for the entropy. In order from greatest entropy to least entropy,  
591 they were: independent model, homogeneous population model, and population tracking.  
592 Elements of this ordering are expected from the form of the models. The independent  
593 model matches the firing rate of each neurons but assumes that they are uncorrelated,  
594 implying a high entropy estimate. Next, we found that the homogeneous population model  
595 had lower entropy than the independent model. However this ordering will depend on the  
596 statistics of the data so may vary from experiment to experiment. The model we propose, the  
597 population tracking model, matches the data statistics of both the independent model and  
598 the homogeneous population model. Hence its predicted entropy must be less than or equal  
599 to both of these two previous models. One important note is that the relative accuracies of  
600 the various models should not be taken as fixed, but will depend both on the statistics of  
601 the data and on the choices of the priors.

602 In summary, of the six models we tested on synthetic data, the population tracking model

603 consistently performed best. It converged on entropy estimates close to the true value even  
604 for data from populations as large as 1000 neurons.

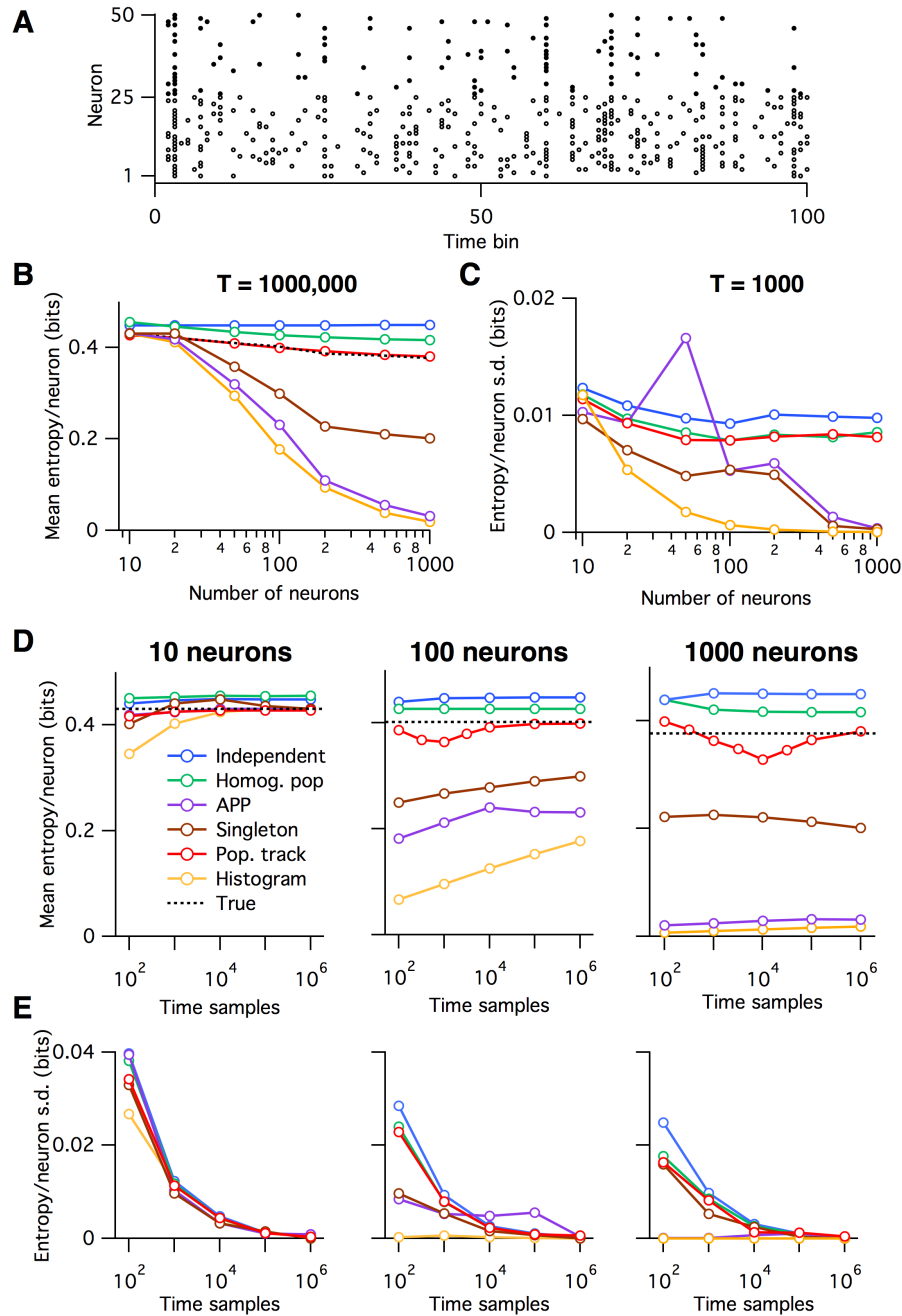

Fig. 4: Convergence of entropy estimate as a function of the number of neurons and time samples analyzed.

**A**: Example spiking data from the DG model with two subpopulations, a low firing rate group (filled black circles) and a higher firing rate group (open circles).

**B–C**: Mean (B) and standard deviation (C) of estimated entropy per neuron as a function of the number of neurons analyzed, for each of the various models.

**D–E**: The mean (D) and standard deviation (E) of estimated entropy per neuron as a function of the number of timesteps considered, for data from varying numbers of neurons (left to right).

## 2.6 Population tracking model accurately predicts probabilities for both seen and unseen patterns

The above analysis involved estimating a single summary statistic, the entropy, for the entire  $2^N$ -dimensional pattern probability distribution. But how well do the models do at predicting the probability of individual population activity patterns? To test this we fit four of the six models to the same DG-generated data as the previous section, with  $N = 100$  and  $T = 10^6$ . As seen in Figure 4D–E, for data of this size the entropy predictions of the three statistical models had converged, but the histogram method’s estimate had not. We then drew 100 new samples from the same DG model, calculated all four models’ predictions of pattern probability for each sample, and compared the predictions with the known true probabilities (Figure 5).

The independent model’s predictions deviated systematically from the true pattern probabilities. In particular, it tended to underestimate both high-probability and low-probability patterns, while overestimating intermediate probability patterns. It is important to note that the data in Figure 5 are presented on a log scale. Hence these deviations correspond to many orders of magnitude error in pattern probability estimates. The homogeneous population model did not show any systematic biases in probability estimates but did show substantial scatter around the identity line, again implying large errors. This is to be expected since this model assumes that all patterns for a given  $k$  have equal probability. In contrast to these two models, the population tracking model that we propose accurately estimated pattern probabilities across the entire observed range. Finally, the histogram method failed dramatically. Although it predicted well the probabilities for the most likely patterns, it quickly deviated from the true values for more rare patterns. And worst of all, it predicts a probability of zero for patterns that it has not seen before, as evidenced by the large number of missing points in the right plot in Figure 5.

One final important point is that of the 100 test samples drawn from the DG model, 63 were not part of the training set (light colored circles in Figure 5). However, the population



632 tracking model showed no difference in accuracy for these unobserved patterns compared  
633 with the 37 patterns previously seen during training (dark circles in Figure 5). Together,  
634 these results show that the population tracking model can accurately estimate probabilities  
635 of both seen and unseen patterns, for data from large numbers of neurons.

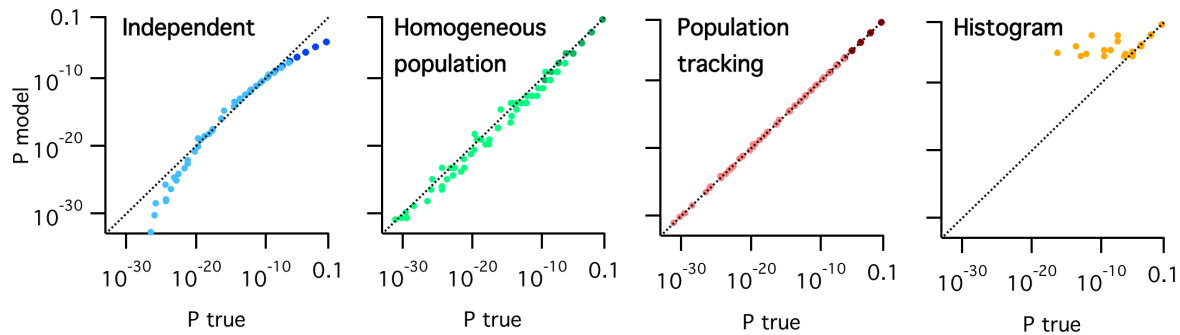

Fig. 5: Predicted pattern probabilities as a function of true pattern probabilities for a population of 100 neurons sampled from the same DG model as Figure 4. From left to right: independent model (blue), homogeneous population model (green), population tracking model (red) and histogram method (amber). In each plot the darker colored symbols correspond to patterns seen during model training and so were used in fitting the model parameters, and lighter colored symbols correspond to new patterns that appeared only in the test set. The histogram plot (right) shows only data for the subset of patterns seen in both the training and test sets. Dashed diagonal line in each plot indicates identity.

## 636 2.7 Model performance for populations with heterogeneous firing 637 rates and correlations

638 In order to calculate the ground truth pattern probabilities and entropy for large  $N$  for  
639 the above analysis, we assumed homogeneous firing rates and correlations to ensure symme-  
640 tries in the pattern probability distributions. However, since the population tracking model  
641 also implicitly assumes some shared correlations across neurons due to their shared depen-  
642 dence on the population rate variable  $K$ , this situation may also bias the results in favor  
643 of the population tracking model in the sense that this may be the regime where  $P_{model}$   
644 best matches  $P_{true}$ . Since *in vivo* neural correlations typically appear to have significant

645 structure (Figure 1C), we also examined the behavior of the model for a scenario with more  
646 heterogeneous firing rates and correlations. We repeated the above analysis using samples  
647 from the DG neuron model with  $N = 10$ , but with individual neuron firing rates drawn from  
648 a normal distribution  $\mu = 0.1$ ,  $\sigma = 0.02$ , and pairwise correlations drawn from a normal  
649 distribution with  $\mu = 0.05$ ,  $\sigma = 0.03$  (Figure 6A). We numerically calculated the  $2^{10} = 1024$   
650 ground truth pattern probabilities by exhaustively sampling from the DG model. We again  
651 varied the number of time samples from 100 to 1,000,000 and fit the population tracking  
652 model and several comparison models: the independent neuron model, the homogeneous  
653 population model, the histogram method, and also the pairwise maximum entropy model  
654 (Schneidman et al., 2006). We computed the Jensen-Shannon (JS) divergence, which is a  
655 measure of the difference between the true and model pattern probability distributions (Fig-  
656 ure 6B), entropy/neuron (Figure 6C), and all 1024 individual pattern probabilities (Figure  
657 6D). Although the population tracking model outperformed the independent and homoge-  
658 neous population models as before, it was outperformed by the pairwise maximum entropy  
659 model on this task. The JS divergence of the population tracking model saturated at a  
660 higher non-zero floor than the pairwise maximum entropy models in Figure 6B. However,  
661 on the other hand the asymptotic error in the population tracking's estimate of entropy was  
662 minimal at +0.0015 bits, or 0.3% (Figure 6C). It is difficult to ascertain whether the pairwise  
663 maximum entropy model would also outperform the population tracking model for large  $N$ ,  
664 and requires further study.

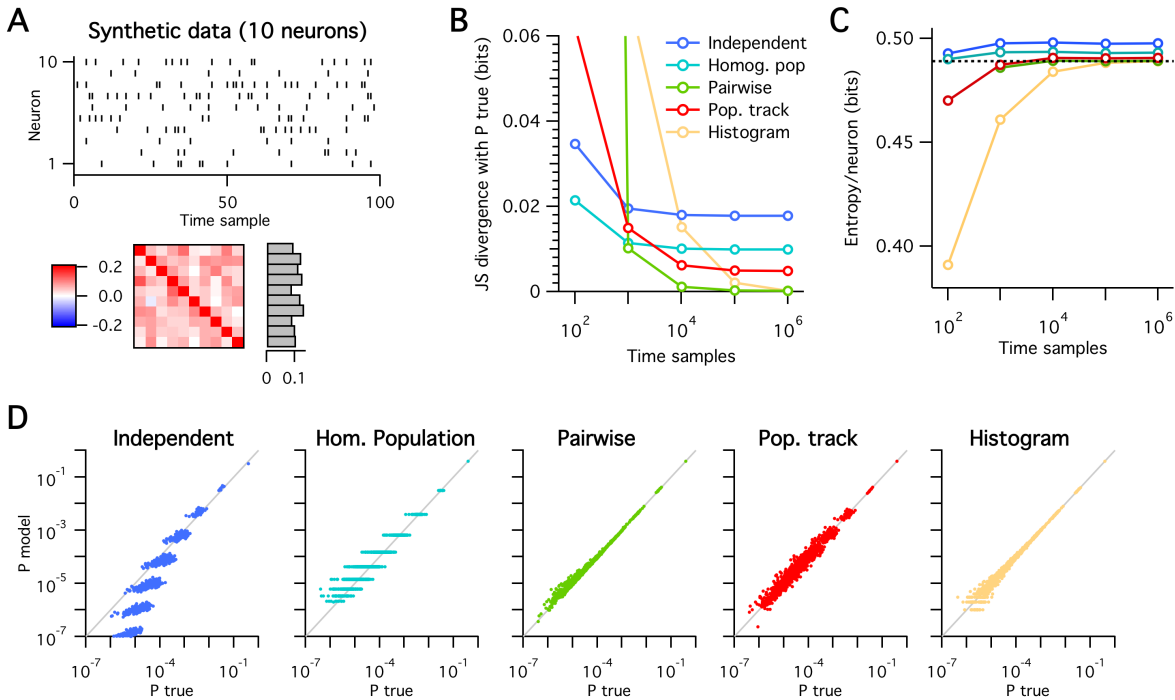

Fig. 6: Performance of various models for data from 10 neurons with heterogeneous firing rates and correlations.

**A:** Example spiking data from the DG model (top left), with heterogeneous correlations and firing rates (bottom).

**B–C:** Jensen-Shannon divergence of each model's predicted pattern probability distribution with the true distribution (B) and entropy per neuron (C) as a function of the number of time samples.

**D:** Predicted pattern probabilities versus true pattern probabilities for each of the tested models (left to right), for 1,000,000 time samples.

## 2.8 Decoding neural population electrophysiological data from monkey visual cortex

665

666

667 We next tested the ability of the population tracking model to decode neural population  
668 responses to stimuli. We analyzed electrode array data recorded from anesthetized macaque  
669 primary visual cortex in response to visual stimuli (Figure 7A, see Experimental Procedures  
670 and Zandvakili and Kohn, 2015 for details). Spike sorting algorithms were applied to the  
671 raw voltage waveforms to extract the times of action potentials from multi-units. Altogether  
672 131 different multi-units were recorded from a single animal. The animal was shown drifting

oriented sinusoidal gratings chosen from eight orientations in a pseudorandom order. Each 1.28 s stimulus presentation was interleaved with a 1.5 s blank screen, and all eight possible stimulus orientations were presented 300 times each.

Our decoding analysis proceeded as follows. We first rebinned the data into 10 ms intervals. If a unit spiked one or more times in a time bin, it was labeled as ON, otherwise it was labelled OFF. Second, we chose a random subset of  $N$  units from the 131 total, and excluded data from the rest. Then for a given stimulus orientation, we randomly split the data from the 300 trials into a 200 trial training set, and 100 trial test set. We concatenated the data from the 200 training trials and fit the population tracking model to this dataset, along with two control statistical models: the independent model and the homogeneous population model. We repeated this procedure separately for the eight different stimulus orientations, so were left with eight different sets of fitted parameters, one for each orientation. We then applied maximum likelihood decoding separately on neural responses to 100 randomly chosen stimuli from the test dataset. Finally, we repeated the entire analysis 100 times for different random subsets of  $N$  neurons and training/test data set partitions, and took a grand average of decoding performance.

We plot the decoding performance of the various statistical models as a function of time since the stimulus onset in Figure 7B. For all models, decoding was initially at chance level ( $1/8 = 0.125$ ), then began to increase around 50 ms after stimulus onset, corresponding to the delay in spiking response in visual cortex (Figure 7A). Decoding performance generally improved monotonically both with the number of neurons and number of timepoints analyzed, for all models. However, decoding performance was much higher for the independent and population tracking models, which saturated at almost 100% correct, compared with  $\sim 25\%$  correct for the homogeneous population model. Hence for these data it appears that the majority of information about the stimulus is encoded in the identities of which neurons are active, and not in the total numbers of neurons active.

Although both the independent and population tracking models saturated to almost 100%

700 decoding performance at long times, we found that for larger sets of neurons, the population  
701 tracking model's performance rose earlier in time than the independent neuron model (Figure  
702 7B–C). For 10 neurons, the independent model and population tracking model reached 50%  
703 accuracy at similar times after stimulus onset (146 ms with 95% c.i. [136.4 : 156] ms for  
704 population tracking model and 142.5 ms with 95% c.i. [133.2 : 152.3] ms for independent  
705 model). However given spiking data from 100 neurons, the population tracking model reached  
706 50% correct decoding performance at 66.1 ms after stimulus onset (95% c.i. [64.2 : 68] ms),  
707 whereas the independent model reached the same level later, at 76.2 ms after stimulus onset  
708 (95% c.i. [74.2 : 78] ms). Although superficially this may appear to be a modest difference in  
709 decoding speed, it is important to note that the baseline time for decoding above chance was  
710 not until 52.3 and 56.8 ms after stimulus onset for the population tracking and independent  
711 models, respectively (see Experimental Procedures for details). The reason for this late  
712 rise in decoding accuracy is the documented  $\sim 50$  ms lag in spiking response in macaque V1  
713 relative to stimulus onset (Chen et al., 2006, 2008) (see Figure 7A). Given that we discretized  
714 the data into timebins of 10 ms, this implies that the population tracking model could decode  
715 stimuli mostly correctly given data from less 2 time frames on average. In summary, these  
716 results show that the population tracking model can perform rapid stimulus decoding.

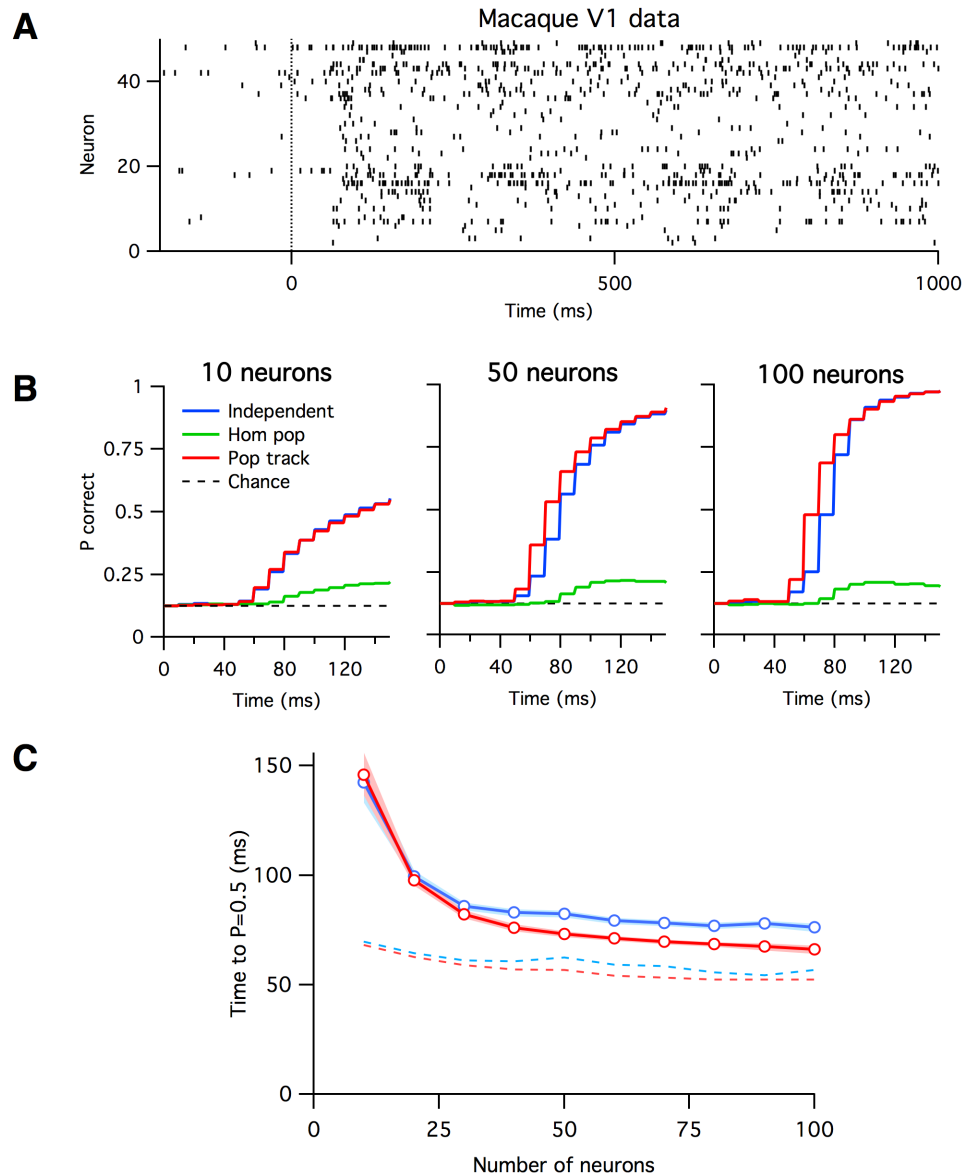

Fig. 7: Decoding neural population spiking data from macaque primary visual cortex in response to oriented bar visual stimuli.

**A:** Example spiking data from fifty neurons during a single presentation of an oriented bar stimulus. Time zero indicates onset of stimulus.

**B:** Decoding performance as a function of time since stimulus onset for three different decoding models (different colored curves) and varying numbers of neurons (plots from left to right). Chance decoding level in all cases was  $1/8 = 0.125$ .

**C:** The mean time since stimulus onset to reach 50% decoding accuracy for the independent (blue) and population tracking (red) models, as a function of the number of neurons analyzed. The dashed curves indicate the time at which decoding accuracy first statistically exceeded noise levels. Time bin size fixed at 10 ms. The homogeneous population model is not shown because it never reached 50% decoding accuracy.

## 717 **2.9 Entropy estimation from two-photon $\text{Ca}^{2+}$ imaging population** 718 **data from mouse somatosensory cortex**

719 As a second test case neurobiological problem, we set out to quantify the typical number  
720 of activity patterns and entropy of populations of neurons in mouse neocortex, across de-  
721 velopment. We applied our analysis method to spontaneous activity in neural populations  
722 from data previously recorded (Gonçalves et al., 2013) by in vivo two-photon  $\text{Ca}^{2+}$  imag-  
723 ing in layer 2/3 primary somatosensory cortex of unanesthetized wild-type mice with the  
724 fluorescent indicator Oregon green BAPTA-1 (see Experimental Procedures for further de-  
725 tails). The original data were recorded at  $\sim 4$  Hz (256 ms timeframes), but for this analysis  
726 we resampled the data into 1 s timebins because we found that it optimized a tradeoff be-  
727 tween catching more neurons in the active state versus maintaining a sufficient number of  
728 timeframes for robust analysis.

729 To compare neural activity across development we used the Shannon entropy/neuron,  $h$   
730 (Figure 8H–I). Shannon entropy is a concept adopted from information theory that quantifies  
731 the uniformity of a probability distribution. If all patterns were equally probable then  $h = 1$   
732 bit. At the opposite extreme, if only one pattern were possible then  $h = 0$  bits. It also has  
733 a functional interpretation as the upper limit on the amount of information the circuit can  
734 code (Cover and Thomas, 2006).

735 We performed the analysis on data from mice at three developmental age points: P9–11  
736 ( $n=13$ ), P14–16 ( $n=8$ ) and P30–40 ( $n=7$ ). These correspond to timepoints just before (P9–  
737 P11) and after (P14–P16) the critical period for cortical plasticity, and mature stage post-  
738 weaning (P30–P40). Entropy is determined by two main properties of the neural population  
739 activity: the activity levels of the neurons and their correlations. We found that mean ON  
740 probability increased between ages P9–P11 and P14–16 ( $p=0.0016$ ), then decreased again at  
741 age P30–40 ( $p=0.0024$ ). As previously observed (Rochefort et al., 2009; Golshani et al., 2009;  
742 Gonçalves et al., 2013), mean pairwise correlations decreased across development ( $p<0.001$ ,  
743 P9–P11 vs P14–P16) (Figure 8D) so that as animals aged there were fewer synchronous

744 events when many neurons were active together (Figure 8A,C).

745 What do these statistics predict for the distribution of activity patterns exhibited by  
746 neural circuits? Interestingly, activity levels and correlations are expected to have opposite  
747 effects on entropy: in the sparse firing regime, any increase ON probability should increase  
748 the entropy by increasing the typical number of activity patterns due to combinatorics, while  
749 an increase in correlations should decrease the entropy because groups of neurons will tend  
750 to be either all ON or all OFF together.

751 When we quantified the entropy of the pattern probability distributions, we found a  
752 non-monotonic trajectory across development (Figure 8F–G). For 100-neuron populations,  
753 in young animals at P9–P11 we found a low group mean entropy of  $\sim 0.38$  bits/neuron (c.i.  
754 [0.347 : 0.406]), followed by an increase at P14–P16 ( $p < 0.001$ ) to  $\sim 0.49$  bits/neuron (c.i.  
755 [0.478 : 0.517]), and then a decrease in adulthood P30–P40 ( $p = 0.036$ ) to  $\sim 0.45$  bits/neuron  
756 (c.i. [0.418 : 0.476]). Although these shifts in dimensionality were subtle as estimated by  
757 entropy, they correspond to exponentially large shifts in pattern number. For example,  
758 100-neuron populations in P14–P16 animals showed an average of  $5.6 \times 10^{10}$  patterns while  
759 100-neuron populations in P30–P40 animals showed an 8-fold fewer number of  $\sim 7.1 \times 10^9$   
760 typical patterns (data not shown). One interpretation of these findings is that young animals  
761 compress their neural representations of stimuli into a small ‘dictionary’ of activity patterns,  
762 then expand their representations into a larger dictionary at P14–P16, before again reducing  
763 the coding space again in adulthood, P30–P40.



2.9 Entropy estimation from two-photon  $\text{Ca}^{2+}$  imaging population data from mouse somatosensory cortex 41

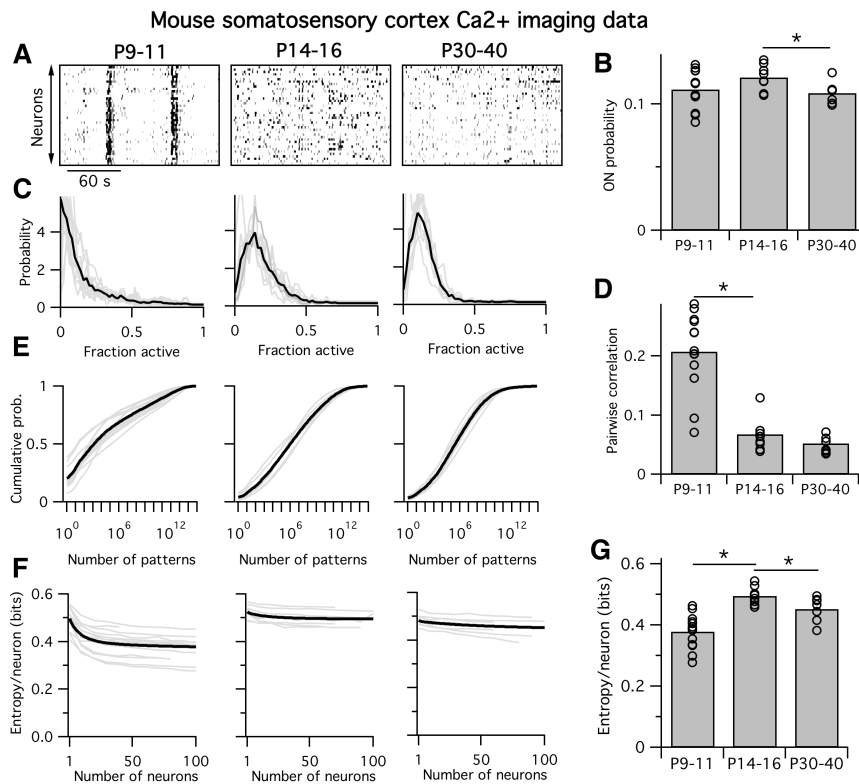

Fig. 8: Entropy of neural populations in mouse somatosensory cortex increases then decreases during development.

**A:** Example  $\text{Ca}^{2+}$  imaging movie from mice ages P9-11 (left), P14-16 (center), and P30-40 (right).

**B:** Mean ON probability of neurons by group. Each circle corresponds to the mean across all neurons recorded in a single animal, bars represent group means.

**C:** Probability density of the fraction of active neurons, for sets of 50 neurons. Light gray traces are distributions from single animals, heavy black traces are group means.

**D:** Mean pairwise correlation between neurons in each group.

**E:** Cumulative distribution of pattern probabilities for each group, for sets of 50 neurons. Note log scale on x-axes.

**F:** Entropy per neuron as a function of the number of neurons analyzed.

**G:** Estimate of mean entropy per neuron for 100 neurons.

764 Is the shift in cortical neural population entropy across development due to changes in  
 765 firing rates, correlations, or both? We assessed this by fitting two control models to the  
 766 same  $\text{Ca}^{2+}$  imaging data: the independent neuron model and the homogeneous population  
 767 model (Figure 9). The independent neuron model captures changes in neural firing rates  
 768 across development, including the heterogeneity in firing rates across the population, but

769 inherently assumes that all correlations are fixed at zero. Although the independent model  
770 predicted a significant decrease in entropy between P14–16 and P30–40 ( $p=0.014$ ) similar  
771 to the population tracking model, it did not detect an increase in entropy from P9–11 to  
772 P14–16 ( $p=0.13$ ) (Figure 9B, left).

773 The homogeneous population model captures a different set of statistics. By matching  
774 the population synchrony distribution, it fits both the mean neuron firing rates and mean  
775 pairwise correlations. However, it also assumes that all neurons have identical firing rates  
776 and identical correlations, hence it does not capture any of the population heterogeneity that  
777 the independent neuron model does. In contrast to the independent model, the homogeneous  
778 population model did predict the increase in entropy from P9–11 to P14–16 ( $p=0.002$ ), but  
779 did not detect a decrease in entropy from P14–16 to P30–40 ( $p=0.24$ ).

780 Importantly, the independent and homogeneous population models always estimate greater  
781 entropy values than the population tracking model. This is to be expected since the popula-  
782 tion tracking model matches the key statistics of both control models together, and so cannot  
783 have a greater entropy than either. Together, these results demonstrate that the population  
784 tracking model can detect shifts in population entropy that could not be detected from either  
785 independent or homogeneous population models alone.

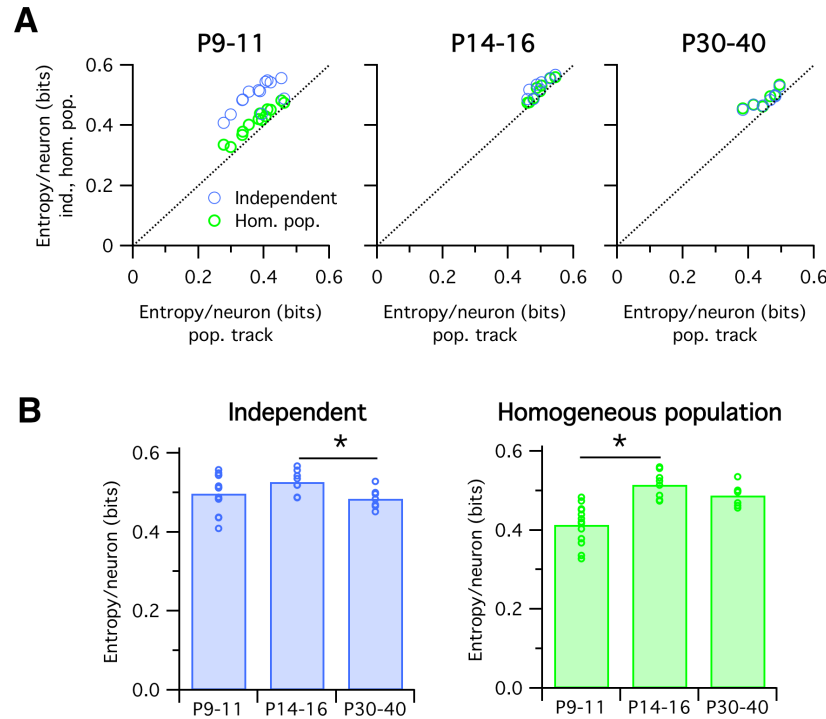

Fig. 9: Mouse somatosensory cortex entropy trajectories are not captured by either the independent or homogeneous population models.

**A:** Entropy per neuron estimated from the independent (blue circles) or homogeneous population (green) models against the same quantity estimated from the population tracking model, for data from mice of three age groups (left, center and right plots). Each circle indicates the joint entropy estimated for 100 neuron population recording from a single animal. Note that the independent and homogeneous population models always estimate greater entropy values than the population tracking model.

**B:** Same data as panel A, plotted to compare to previous Figure 8G. Note that neither the independent (blue, left) nor homogeneous population (green, right) models predict the inverted-U shaped trajectory uncovered by the population tracking model (Figure 8G).

### 786 3 Discussion

787 Here we introduced a novel statistical model for neural population data. The model works  
788 by matching two features of the data: first, the probability distribution for the number of  
789 neurons synchronously active, and second, the conditional probability that each individual  
790 neuron is ON given the total number of active neurons in the population. The former set

791 of parameters are informative about the general statistics of the population activity: the  
792 average firing rates and the level of synchrony. The latter set of parameters tell us more  
793 about the heterogeneity within the population: some neurons tend to follow the activity of  
794 their neighbors, while others tend to act independently. These two types of cells recently  
795 have been called ‘choristers’ and ‘soloists’, respectively (Okun et al., 2015).

796 Compared to existing alternatives (Table 1), the model we propose has several strengths:  
797 1) it is rich enough to accurately predict pattern probabilities, even for large neural pop-  
798 ulations; 2) its parameters are computationally cheap to fit for large  $N$ ; 3) the parameter  
799 estimates converge within an experimentally reasonable number of data timepoints, 4) sam-  
800 pling from the model is straightforward, with no correlation between consecutive samples; 5)  
801 it is readily normalizable to directly obtain pattern probabilities; 6) the model’s form permits  
802 a computationally tractable low-parameter approximation of the entire pattern probability  
803 distribution.

804 These strengths make the model appealing for certain neurobiological problems. However,  
805 since a pattern probability distribution can only be fully specified by  $2^N$  numbers — so  
806 including correlation at all orders — whereas our model has only  $N^2$  parameters, it must  
807 naturally also have some shortcomings. The main weaknesses are: 1) since the population  
808 synchrony distribution becomes more informative with greater  $N$ , our model will in most  
809 cases be outperformed by alternatives for small  $N$ ; 2) although our model captures the mean  
810 pairwise correlation across the population, it does not account for the full pairwise correlation  
811 structure (Figure 2C, center); 3) since the model considers only spatial correlations, temporal  
812 correlations are unaccounted for (Figure 2C, right); 4) The model parameters are not readily  
813 interpretable in a biological sense, unlike the pairwise couplings of the maximum entropy  
814 models (Schneidman et al., 2006), or the stimulus filters in Generalized Linear Models (Pillow  
815 et al., 2008); 5) unlike classic maximum entropy models, ours carries no notion of an energy  
816 landscape and so does not imply a natural dynamics across the state space (Tkacik et al.,  
817 2014).

818 We demonstrated the utility of the population tracking model by applying it to two  
819 neurobiological problems. First, we found that the population tracking model allowed fast  
820 prediction of visual stimuli by decoding neural population data from macaque primary visual  
821 cortex (Figure 7). A simple but widely used alternative model that assumes independent  
822 neurons achieved 50% decoding accuracy around 20 ms after performance rose above chance  
823 levels. In contrast, the population tracking model reached 50% accuracy only  $\sim 14$  ms  
824 after exceeding chance levels. Since we binned time in 10 ms intervals, this implies that  
825 the population tracking model was correct more often than not given neural population  
826 data from less than two timepoints, on average. What does this finding imply for brain  
827 function? The actual decoding algorithm we used for this task, Maximum Likelihood, is not  
828 neurobiologically plausible. However, the fact that the population tracking model worked  
829 so well implies two things about cortical visual processing. First, sufficient information is  
830 present in the spiking patterns of these neural populations to perform stimulus discrimination  
831 very quickly after the stimulus response onset. Previous studies found that good decoding  
832 performance for similar tasks was typically achieved at least 80–100 ms following stimulus  
833 onset (Chen et al., 2008; Berens et al., 2012), whereas the population tracking model took  
834 only  $\sim 65$  ms. However, direct comparisons with these previous studies are problematic: for  
835 example, on the one hand Berens et al. (2012) examined only 20 units while we considered  
836 groups up to  $N = 100$ , but on the other hand Berens et al. (2012) considered only a binary  
837 classification task whereas we considered the more difficult task of decoding a single stimulus  
838 orientation from all eight possibilities. Further work is needed to resolve these issues. Second,  
839 the improved performance of the population tracking model over the independent model  
840 implies that it may be beneficial for the brain to explicitly represent the number of neurons  
841 simultaneously active in the local circuit. Indeed this seems like a natural computation for  
842 single neurons to perform as they sum the synaptic inputs from their neighboring neurons.  
843 Our finding implies that this summed value itself carries additional information about the  
844 stimulus beyond that present in the list of identities of active neurons. Whether and how

845 the brain uses this information remain questions for future study.

846 Our second application of the population tracking model was to look for changes in  
847 the distribution of neural pattern probabilities in mouse somatosensory cortex across devel-  
848 opment (Figure 8). We found a surprising non-monotonic trajectory across development.  
849 Initially at P9–11 the entropy of population activity is low, due to large synchronous events  
850 in the population. The correlations decrease dramatically at around P12 (Golshani et al.,  
851 2009; Rochefort et al., 2009), so that at P14–16 activity is relatively desynchronized, leading  
852 to an increase in population entropy. However, we then found a reduction in firing rates  
853 from P14–16 to P30–40 that corresponded to a decrease in entropy, despite no large change  
854 in correlations. These findings uncover a subtle and unexplained developmental trajectory  
855 for mouse somatosensory cortex that warrants detailed further study. Importantly, this non-  
856 monotonic development curve would not have been detectable by examining either firing  
857 rates or correlations in isolation (Figure 9).

858 The population tracking model we propose is similar in spirit to a recently proposed  
859 alternative, the population coupling model (Okun et al., 2012, 2015; Schölvinck et al., 2015).  
860 These authors developed a model of neural population data with  $3N$  parameters:  $N$  speci-  
861 fying the firing rates of each neuron, another  $N$  specifying the population rate distribution,  
862 and a final  $N$  specifying the linear coupling of each individual neuron with the population  
863 rate. Okun et al. (2015) fit this model to data from mouse, rat, and primate cortex and  
864 found that neighboring neurons showed diverse couplings to the population rate, that this  
865 coupling was invariant to stimulus conditions, and that the degree of a neuron’s popula-  
866 tion coupling was reflected in the number of synaptic inputs it received from its neighbors.  
867 These results show that the population rate contains valuable statistical information that  
868 can help constrain models of neural population dynamics. Despite these notable advances,  
869 the population coupling model of Okun et al. also suffers from several shortcomings that our  
870 model does not: first, it offers no way to write down either the probability of a single neural  
871 activity pattern or the relative probabilities of two activity patterns in terms of the model’s

872 parameters. Second, for large neural populations there is no way to estimate functions of the  
873 entire pattern probability distribution, such as the Shannon entropy or the Kullback-Leibler  
874 divergence. Third, generating samples from the model involves a computationally expen-  
875 sive iterative procedure, and the probability distribution across possible samples is not fully  
876 determined by the model parameters, but depends also on the experimenter's choice of sam-  
877 pling algorithm. Finally, the model assumes a linear relationship between each individual  
878 neuron's firing rate and the population rate. Although parsimonious, this linear model may  
879 be insufficiently flexible to capture the true relationship. Also a linear model must break  
880 down at some point: a neuron cannot fire at rates less than zero Hertz or at rates higher  
881 than its maximal firing frequency. For all of these reasons, we suggest that the model we  
882 propose may be applicable to a wider range of neurobiological problems than the population  
883 coupling model.

884 In what scenarios will the population tracking model do best and worst in? Intuitively, the  
885 model will do best when the true pattern probability distribution, which in principle could  
886 take any arbitrary shape in its  $2^N$ -dimensional space, is nearby to the family of probability  
887 distributions that are attainable from the population tracking model, which has only  $N^2$   
888 degrees of freedom. A rigorous mathematical understanding of the neural activity regimes  
889 that could be well-matched by the population tracking model remains a goal for future  
890 studies. Nevertheless, we can hazard an answer to this question based on the form of the  
891 model. Given that the population tracking model assumes that all individual neurons are  
892 coupled only via a single global population rate variable  $K$ , it will be unlikely that the  
893 model can well capture any correlations within or between any specific subgroups present in  
894 the data. Presumably the degree of error that this introduces will increase with increasing  
895 heterogeneity in correlation structure, especially if the neural population is highly modular.  
896 Indeed we found that the entropy estimated for heterogeneous DG model samples was less  
897 accurate than the case where DG model parameters were more homogeneous (compare Figure  
898 4D, left with Figure 6C). We do note however that the population tracking model can capture

899 some of the pairwise correlation structure beyond the means, as observed in Figure 2C and  
900 Appendix Figure 1. This may be due to the fact that the model captures the heterogeneity  
901 in firing rates, which can affect pairwise correlations (de la Rocha et al., 2007). Overall, we  
902 suggest that the primary benefit of the population tracking model may not be that it is the  
903 most accurate of all available models, but that it preserves its accuracy and tractability for  
904 large  $N$  datasets.

905 What type of new neurobiological research questions can we ask with the population  
906 tracking model? We introduced a method for calculating the divergence between the model  
907 fits to two sets of neural population activity data. This measure should be useful for ex-  
908 periments where the same neurons are recorded in two or more different conditions, such as  
909 comparing the statistics of spontaneous activity with that evoked by stimuli (Figure 5), or  
910 the effects of an acute pharmacological or optogenetic stimulation on neural circuit activ-  
911 ity. In contrast, if experiments involve comparing neural population activity from different  
912 animals, such as genetically distinct animals or at different timepoints in development, one  
913 can still perform quantitative comparisons of the activity statistics at a grouped population  
914 level (Figure 8).

915 The most direct usage of our model may however be to provide limits and constraints on  
916 future theoretical models of neural population coding. The Shannon entropy is a particularly  
917 useful measure because it provides an upper bound on the information that the neural  
918 population can represent. We conjecture, but have not proven, that our model is maximum  
919 entropy given the parameters. Adding temporal correlations, which real neurons show but  
920 are not included in the population tracking model, can only further reduce the population  
921 entropy. Hence, assuming that enough data are available for the model parameter fits to  
922 converge, the entropy estimate from the population tracking model gives a hard upper bound  
923 on the coding capacity of a circuit. Any feasible model for neural processing in a given brain  
924 region must obey these limits.



---

## 925 **Acknowledgements**

926 We thank Conor Houghton, Timothy O’Leary, Hannes Saal, and Alex Williams for comments  
927 on earlier versions of the manuscript. This study was supported by funding from FRAXA  
928 Research Foundation, Howard Hughes Medical Institute, Sloan-Swartz Foundation, the Dana  
929 Foundation, and the NIH (NICHD R01HD054453 and NINDS RC1NS068093). The macaque  
930 recordings from the laboratory of Adam Kohn were funded by NIH grant EY016774.

## 931 **Appendix**

### 932 **Macaque electrophysiological recording**

933 All macaque electrophysiology data were previously published (Zandvakili and Kohn, 2015)  
934 and kindly shared by A. Kohn. Full details of experimental procedures and raw data pro-  
935 cessing steps are available in Zandvakili and Kohn (2015).

### 936 **Mouse in vivo calcium imaging recording**

937 All Ca<sup>2+</sup> imaging data were previously published (Gonçalves et al., 2013). Briefly, data  
938 were collected from male and female C57Bl/6 wild-type mice at P9–40. Mice were anes-  
939 thetized with isoflurane, and a cranial window was fitted over primary somatosensory cortex  
940 by stereotaxic coordinates. Mice were then transferred to a two-photon microscope and  
941 headfixed to the stage while still under isoflurane anesthesia. 2–4 injections of the Ca<sup>2+</sup> sen-  
942 sitive Oregon-Green BAPTA-1 (OGB) dye and sulforhodamine-101 (to visualize astrocytes)  
943 were injected 200  $\mu$ m below the dura. Calcium imaging was performed using a Ti-Sapphire  
944 Chameleon Ultra II laser (Coherent) tuned to 800 nm. Imaging in unanesthetized mice  
945 began within 30–60 mins of stopping the flow of isoflurane after the last OGB injection. Im-  
946 ages were acquired using ScanImage software (Pologruto et al., 2003) written in MATLAB  
947 (MathWorks). Whole-field images were collected using a 20 $\times$  0.95 NA objective (Olympus)

948 at an acquisition speed of 3.9 Hz ( $512 \times 128$  pixels).

949 Several 3-minute movies were concatenated and brief segments of motion artifacts were  
950 removed (always  $<10$  s total). Data were corrected for  $x$ - $y$  drift. Cell contours were auto-  
951 matically detected and the average  $\Delta F/F$  signal of each cell body was calculated at each  
952 time point. Each  $\Delta F/F$  trace was low-pass filtered using a Butterworth filter (coefficient of  
953 0.16) and deconvolved with a 2 s single-exponential kernel (Yaksi and Friedrich, 2006). To  
954 remove baseline noise, the standard deviation of all points below zero in each deconvolved  
955 trace was calculated, multiplied by two, and set as the positive threshold level below which  
956 all points in the deconvolved trace were set to zero. Estimated firing rates of the neurons,  
957  $r_i(t)$ , were then obtained by multiplying the deconvolved trace by a factor of 78.4, which was  
958 previously derived empirically from cell-attached recordings *in vivo* (Golshani et al., 2009).

## 959 **Data analysis methods**

960 All data analysis and calculations were done using MATLAB (The Mathworks).

## 961 **Statistical tests**

962 To avoid parametric assumptions, all statistical tests were done using standard bootstrapping  
963 methods with custom-written MATLAB scripts. For example when assessing the observed  
964 difference between two group means  $\Delta\mu_{obs}$  we performed the following procedure to calculate  
965 a p-value. First we pool the data points from the two groups to create a null set  $S_{null}$ . We  
966 then construct two hypothetical groups of samples  $S_1$  and  $S_2$  from this by randomly drawing  
967  $n_1$  and  $n_2$  samples with replacement from  $S_{null}$ , where  $n_1$  and  $n_2$  are the number of data  
968 points in the original groups 1 and 2 respectively. We take the mean of both hypothetical  
969 sets  $\mu_1$  and  $\mu_2$  and calculate their difference  $\Delta\mu_{null} = \mu_1 - \mu_2$ . We then repeat the entire  
970 procedure  $10^7$  times to build up a histogram of  $\Delta\mu_{null}$ . This distribution is always centered  
971 at zero. After normalizing, this can be interpreted as the probability distribution  $\Pr(\Delta\mu_{null})$   
972 for observing a group mean difference of  $\Delta\mu_{null}$  purely by chance if the data were actually

973 sampled from the same null distribution. Then the final p-value for the probability of finding  
974 a group difference of at least  $\Delta\mu_{obs}$  in either direction is given by

$$p = \int_{-\infty}^{-\Delta\mu_{obs}} \Pr(\Delta\mu_{null}) d\Delta\mu_{null} + \int_{\Delta\mu_{obs}}^{\infty} \Pr(\Delta\mu_{null}) d\Delta\mu_{null}$$

975 Any data that varied over multiple orders of magnitude (e.g. the number of patterns  
976 observed) was log-transformed before comparing group means.

### 977 **Conversion from firing rate to ON/OFF probabilities for Ca<sup>2+</sup> imaging data**

978 For the Ca<sup>2+</sup> imaging data, we began with estimated firing rate time series  $r_i(t)$  for each  
979 neuron  $i$  recorded as part of a population of  $N$  neurons. For later parts of the analysis we  
980 needed to convert these firing rates to binary ON/OFF values. This conversion involves  
981 a choice. One option would be to simply threshold the data, but this would throw away  
982 information about the magnitude of the firing rate. We instead take a probabilistic approach  
983 where rather than deciding definitively whether a given neuron was ON or OFF in a given  
984 time bin, we calculate the probability that the neuron was ON or OFF by assuming that  
985 neurons fire action potentials according to an inhomogeneous Poisson process with rate  $r_i(t)$ .  
986 The mean number of spikes  $\lambda_i(t)$  expected in a time bin of width  $\Delta t$  is  $\lambda_i(t) = r_i(t) \times \Delta t$ . We  
987 choose  $\Delta t = 1$  second. Under the Poisson model the actual number of spikes  $m$  in a particular  
988 time bin is a random variable that follows the Poisson distribution  $P(m = k) = \frac{\lambda^k e^{-\lambda}}{k!}$ . We  
989 will consider a neuron active (ON) if it is firing one or more spikes in a given time bin. Hence  
990 the probability that a neuron is ON is  $p_{on}(t) = 1 - P(m = 0) = 1 - e^{-\lambda}$ . This approach has  
991 two advantages over thresholding: 1) it preserves some information about the magnitude of  
992 firing rates, and 2) it acts to regularize the probability distribution for the number of neurons  
993 active by essentially smoothing nearby values together.

994 **Entropy estimation for large numbers of neurons for Ca<sup>2+</sup> imaging data**

995 The entropy/neuron generally decreased slightly with the number of neurons considered as  
996 result of the population correlations (see Figure 8F in main text), so we needed to control for  
997 neural population size when comparing data from different experimental groups. On the one  
998 hand we would like to study as large a number of neurons as possible, because we expect the  
999 effects of collective network dynamics to be stronger for large population sizes and this may  
1000 be the regime where differences between the groups emerge. On the other hand our recording  
1001 methods allowed us to sample only typically around  $\sim 100$  neurons at a time, and as few as  
1002 40 neurons in some animals. Hence we proceeded by first estimating the entropy/neuron in  
1003 each animal by calculating the entropy of random subsets of neurons of varying size from 10  
1004 to 100 (if possible) in steps of 10. For each population size we sampled a large number of  
1005 independent subsets, calculated the entropy of each. Finally for each dataset we fit a simple  
1006 decaying exponential function to the entropy/neuron as a function of the number of neurons:  
1007  $\frac{H(N)}{N} = Ae^{-bN} + c$ , and used this fit to estimate  $H/N$  for 100 neurons.

1008

1009 **Appendix Figure 1.**

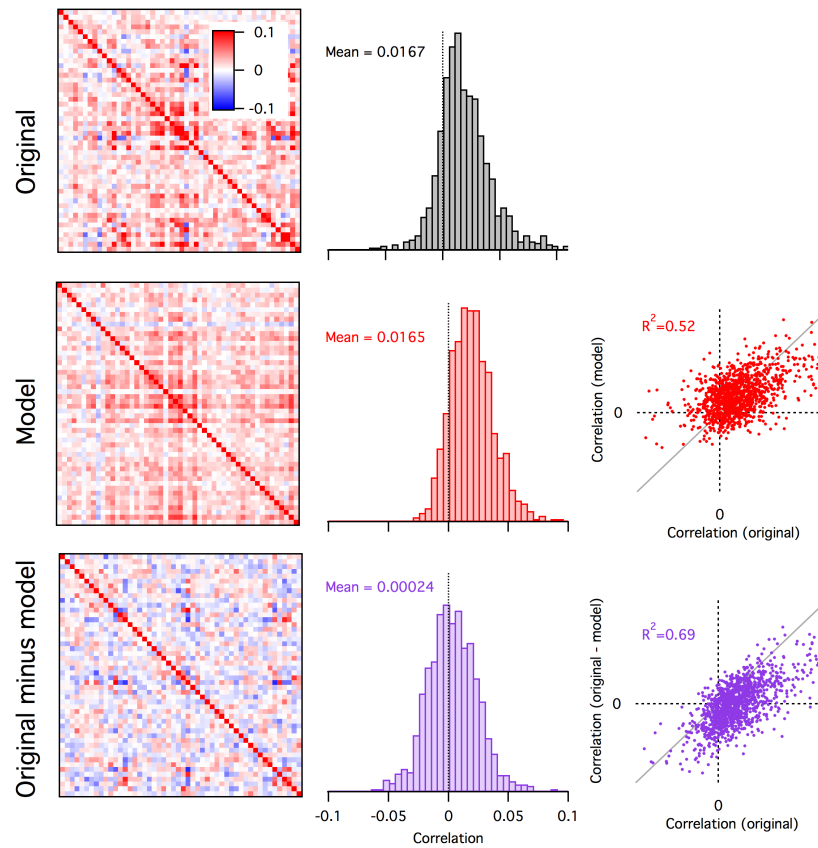

**Appendix Figure 1:** The population tracking model partially recapitulates the pairwise correlation structure of the original data. Left column are the pairwise correlation matrices from the example data shown in Figure 2 (top), for samples drawn from the population tracking model fit to these data (center), and the residual pairwise correlations in the data after subtracting the covariance accounted for by the population tracking model and renormalizing (bottom). Center column are histograms of the pairwise correlations from each matrix in the left column. The scatter plots in the right column show the individual pairwise correlations of the model (red) and the data minus the model (purple) against the pairwise correlations in the original data. Note that the model almost exactly captures the mean pairwise correlation of the original data, and part of the remaining structure ( $R^2 = 0.52$ ).

1010 **References**

- 1011 Amari, S.-I., Nakahara, H., Wu, S., and Sakai, Y. (2003). Synchronous firing and higher-order  
1012 interactions in neuron pool. *Neural computation*.
- 1013 Archer, E. W., Park, I. M., and Pillow, J. W. (2013). Bayesian entropy estimation for binary  
1014 spike train data using parametric prior knowledge. *Advances in neural information . . . .*
- 1015 Averbeck, B. B., Latham, P. E., and Pouget, A. (2006). Neural correlations, population  
1016 coding and computation. *Nature reviews Neuroscience*.
- 1017 Berens, P., Ecker, A. S., Cotton, R. J., Ma, W. J., Bethge, M., and Tolias, A. S. (2012). A  
1018 fast and simple population code for orientation in primate V1. *The Journal of neuroscience*  
1019 *: the official journal of the Society for Neuroscience*.
- 1020 Berkes, P., Orbán, G., Lengyel, M., and Fiser, J. (2011). Spontaneous cortical activity  
1021 reveals hallmarks of an optimal internal model of the environment. *Science*.
- 1022 Berry II, M. J., Tkacik, G., Dubuis, J., Marre, O., and da Silveira, R. A. (2013). A simple  
1023 method for estimating the entropy of neural activity. *Journal of Statistical Mechanics:*  
1024 *Theory and Experiment*.
- 1025 Broderick, T., Dudik, M., Tkacik, G., Schapire, R. E., and Bialek, W. (2007). Faster solutions  
1026 of the inverse pairwise Ising problem. *arXiv.org*.
- 1027 Buzsáki, G. and Mizuseki, K. (2014). The log-dynamic brain: how skewed distributions  
1028 affect network operations. *Nature reviews Neuroscience*.
- 1029 Chen, Y., Geisler, W. S., and Seidemann, E. (2006). Optimal decoding of correlated neural  
1030 population responses in the primate visual cortex. *Nature neuroscience*.
- 1031 Chen, Y., Geisler, W. S., and Seidemann, E. (2008). Optimal temporal decoding of neural  
1032 population responses in a reaction-time visual detection task. *Journal of neurophysiology*.

- 1033 Churchland, P. S. and Sejnowski, T. J. (1994). *The Computational Brain*. Mit Press.
- 1034 Cohen, M. R. and Kohn, A. (2011). Measuring and interpreting neuronal correlations. *Nature*  
1035 *neuroscience*.
- 1036 Cover, T. M. and Thomas, J. A. (2006). *Elements of Information Theory*. Wiley-Interscience.
- 1037 Cui, Y., Liu, L. D., McFarland, J. M., Pack, C. C., and Butts, D. A. (2016). Inferring  
1038 Cortical Variability from Local Field Potentials. *The Journal of neuroscience : the official*  
1039 *journal of the Society for Neuroscience*.
- 1040 Cunningham, J. P. and Yu, B. M. (2014). Dimensionality reduction for large-scale neural  
1041 recordings. *Nature neuroscience*.
- 1042 de la Rocha, J., Doiron, B., Shea-Brown, E., Josić, K., and Reyes, A. (2007). Correlation  
1043 between neural spike trains increases with firing rate. *Nature*.
- 1044 Ganmor, E., Segev, R., and Schneidman, E. (2011). Sparse low-order interaction network  
1045 underlies a highly correlated and learnable neural population code.
- 1046 Gerstein, G. L. and Perkel, D. H. (1969). Simultaneously recorded trains of action potentials:  
1047 analysis and functional interpretation. *Science*.
- 1048 Gerstein, G. L. and Perkel, D. H. (1972). Mutual temporal relationships among neuronal  
1049 spike trains. Statistical techniques for display and analysis. *Biophysical journal*.
- 1050 Golshani, P., Gonçalves, J. T., Khoshkhoo, S., Mostany, R., Smirnakis, S., and Portera-  
1051 Cailliau, C. (2009). Internally mediated developmental desynchronization of neocortical  
1052 network activity. *The Journal of neuroscience : the official journal of the Society for*  
1053 *Neuroscience*.
- 1054 Gonçalves, J. T., Anstey, J. E., Golshani, P., and Portera-Cailliau, C. (2013). Circuit level  
1055 defects in the developing neocortex of Fragile X mice. *Nature neuroscience*.

- 1056 Köster, U., Sohl-Dickstein, J., Gray, C. M., and Olshausen, B. A. (2014). Modeling higher-  
1057 order correlations within cortical microcolumns. *PLoS computational biology*.
- 1058 Macke, J. H., Berens, P., Ecker, A. S., Tolias, A. S., and Bethge, M. (2009). Generating  
1059 spike trains with specified correlation coefficients. *Neural computation*.
- 1060 Macke, J. H., Murray, I., and Latham, P. E. (2011a). How biased are maximum entropy  
1061 models? *Advances in neural information . . . .*
- 1062 Macke, J. H., Opper, M., and Bethge, M. (2011b). Common input explains higher-order  
1063 correlations and entropy in a simple model of neural population activity. *Physical review*  
1064 *letters*.
- 1065 Marre, O., El Boustani, S., Frégnac, Y., and Destexhe, A. (2009). Prediction of spatiotem-  
1066 poral patterns of neural activity from pairwise correlations. *Physical review letters*.
- 1067 Nasser, H., Marre, O., and Cessac, B. (2013). Spatio-temporal spike train analysis for large  
1068 scale networks using the maximum entropy principle and Monte Carlo method. *Journal*  
1069 *of Statistical Mechanics: Theory and Experiment*.
- 1070 Ohiorhenuan, I. E., Mechler, F., Purpura, K. P., Schmid, A. M., Hu, Q., and Victor, J. D.  
1071 (2010). Sparse coding and high-order correlations in fine-scale cortical networks. *Nature*.
- 1072 Okun, M., Steinmetz, N. A., Cossell, L., Iacaruso, M. F., Ko, H., Bartho, P., Moore, T.,  
1073 Hofer, S. B., Mrsic-Flogel, T. D., Carandini, M., and Harris, K. D. (2015). Diverse coupling  
1074 of neurons to populations in sensory cortex. *Nature*.
- 1075 Okun, M., Yger, P., Marguet, S. L., Gerard-Mercier, F., Benucci, A., Katzner, S., Busse,  
1076 L., Carandini, M., and Harris, K. D. (2012). Population rate dynamics and multineuron  
1077 firing patterns in sensory cortex. *The Journal of neuroscience : the official journal of the*  
1078 *Society for Neuroscience*.



- 1079 Park, I. M., Archer, E. W., Latimer, K., and Pillow, J. W. (2013). Universal models for  
1080 binary spike patterns using centered Dirichlet processes. *Advances in neural . . . .*
- 1081 Perkel, D. H., Gerstein, G. L., and Moore, G. P. (1967). Neuronal spike trains and stochastic  
1082 point processes. II. Simultaneous spike trains. *Biophysical journal*.
- 1083 Pillow, J. W., Shlens, J., Paninski, L., Sher, A., Litke, A. M., Chichilnisky, E. J., and  
1084 Simoncelli, E. P. (2008). Spatio-temporal correlations and visual signalling in a complete  
1085 neuronal population. *Nature*.
- 1086 Pnevmatikakis, E. A., Soudry, D., Gao, Y., Machado, T. A., Merel, J., Pfau, D., Reardon,  
1087 T., Mu, Y., Lacefield, C., Yang, W., Ahrens, M., Bruno, R., Jessell, T. M., Peterka, D. S.,  
1088 Yuste, R., and Paninski, L. (2016). Simultaneous Denoising, Deconvolution, and Demixing  
1089 of Calcium Imaging Data. *Neuron*.
- 1090 Pologruto, T. A., Sabatini, B. L., and Svoboda, K. (2003). ScanImage: flexible software for  
1091 operating laser scanning microscopes. *Biomedical engineering online*.
- 1092 Quiroga, R. Q. (2012). Spike sorting. *Current biology : CB*.
- 1093 Rahmati, V., Kirmse, K., Marković, D., Holthoff, K., and Kiebel, S. J. (2016). Inferring  
1094 Neuronal Dynamics from Calcium Imaging Data Using Biophysical Models and Bayesian  
1095 Inference. *PLoS computational biology*.
- 1096 Rochefort, N. L., Garaschuk, O., Milos, R.-I., Narushima, M., Marandi, N., Pichler, B.,  
1097 Kovalchuk, Y., and Konnerth, A. (2009). Sparsification of neuronal activity in the visual  
1098 cortex at eye-opening.
- 1099 Roudi, Y., Nirenberg, S., and Latham, P. E. (2009). Pairwise maximum entropy models  
1100 for studying large biological systems: when they can work and when they can't. *PLoS*  
1101 *computational biology*.

- 1102 Schaub, M. T. and Schultz, S. R. (2012). The Ising decoder: reading out the activity of large  
1103 neural ensembles. *Journal of computational neuroscience*.
- 1104 Schneidman, E., Berry, M. J., Segev, R., and Bialek, W. (2006). Weak pairwise correlations  
1105 imply strongly correlated network states in a neural population. *Nature*.
- 1106 Schölvinck, M. L., Saleem, A. B., Benucci, A., Harris, K. D., and Carandini, M. (2015).  
1107 Cortical state determines global variability and correlations in visual cortex. *The Journal*  
1108 *of neuroscience : the official journal of the Society for Neuroscience*.
- 1109 Shlens, J., Field, G. D., Gauthier, J. L., Grivich, M. I., Petrusca, D., Sher, A., Litke, A. M.,  
1110 and Chichilnisky, E. J. (2006). The structure of multi-neuron firing patterns in primate  
1111 retina. *The Journal of neuroscience : the official journal of the Society for Neuroscience*.
- 1112 Singer, W. (1999). Neuronal Synchrony: A Versatile Code for the Definition of Relations?  
1113 *Neuron*.
- 1114 Stevenson, I. H. and Kording, K. P. (2011). How advances in neural recording affect data  
1115 analysis. *Nature neuroscience*.
- 1116 Tang, A., Jackson, D., Hobbs, J., Chen, W., Smith, J. L., Patel, H., Prieto, A., Petrusca,  
1117 D., Grivich, M. I., Sher, A., Hottowy, P., Dabrowski, W., Litke, A. M., and Beggs, J. M.  
1118 (2008). A maximum entropy model applied to spatial and temporal correlations from  
1119 cortical networks in vitro. *The Journal of neuroscience : the official journal of the Society*  
1120 *for Neuroscience*.
- 1121 Tkacik, G., Marre, O., Amodei, D., Schneidman, E., Bialek, W., and Berry, M. J. (2014).  
1122 Searching for collective behavior in a large network of sensory neurons. *PLoS computational*  
1123 *biology*.
- 1124 Tkacik, G., Marre, O., Mora, T., Amodei, D., Berry II, M. J., and Bialek, W. (2013). The

- 1125     simplest maximum entropy model for collective behavior in a neural network. *Journal of*  
1126     *Statistical Mechanics: Theory and Experiment*.
- 1127     Yaksi, E. and Friedrich, R. W. (2006). Reconstruction of firing rate changes across neuronal  
1128     populations by temporally deconvolved Ca<sup>2+</sup> imaging. *Nature methods*.
- 1129     Yeh, F.-C., Tang, A., Hobbs, J., Hottowy, P., Dabrowski, W., Sher, A., Litke, A., and Beggs,  
1130     J. (2010). Maximum Entropy Approaches to Living Neural Networks. *Entropy*.
- 1131     Yu, S., Huang, D., Singer, W., and Nikolić, D. (2008). A small world of neuronal synchrony.  
1132     *Cereb Cortex*.
- 1133     Yu, S., Yang, H., Nakahara, H., Santos, G. S., Nikolić, D., and Plenz, D. (2011). Higher-order  
1134     interactions characterized in cortical activity. *The Journal of neuroscience : the official*  
1135     *journal of the Society for Neuroscience*.
- 1136     Zandvakili, A. and Kohn, A. (2015). Coordinated Neuronal Activity Enhances Corticocor-  
1137     tical Communication. *Neuron*.
- 1138     Zohary, E., Shadlen, M. N., and Newsome, W. T. (1994). Correlated neuronal discharge rate  
1139     and its implications for psychophysical performance. *Nature*.
